# Supplementary material for: Bioorganopromoted green Friedländer synthesis: a versatile new malic acid promoted solvent free approach to multisubstituted quinolines
Source: Royal Society of Chemistry journal article supplement (doi:10.1039/c6nj03907c), 2017-01-01
Supplement: c6nj03907c1.pdf [file c6nj03907c1.pdf]

## Supporting Information

### **Bioorganocatalyzed Green Friedländer : A versatile new Malic acid promoted solvent free approach to multisubstituted quinolines**

Fatima Tufail,<sup>a#</sup> Mohammad Saquib,<sup>a#</sup> Swastika Singh,<sup>a</sup> Jyoti Tiwari,<sup>a</sup> Mandavi Singh,<sup>a</sup> Jaya Singh,<sup>b</sup> Jagdamba Singh<sup>a\*</sup>

<sup>a</sup>*Environmentally Benign Synthesis Lab, Department of Chemistry, University of Allahabad, Allahabad-211002 (India); Tel: +919415218507; E-mail: dr.jdsau@gmail.com*

<sup>b</sup>*Department of Chemistry, LRPG College, Sahibabad, Ghaziabad-201007 (India)*

<sup>#</sup> *Equal Contribution*

*Page Nos.*

|                                                                                                      |       |
|------------------------------------------------------------------------------------------------------|-------|
| Title Page                                                                                           | 1     |
| Experimental (General Remarks)                                                                       | 2     |
| General Experimental Procedure                                                                       | 3     |
| Spectral data of representative compounds <b>3, 6b, 6d, 6h, 8a, 8b, 8f, 10, 12, 14</b> and <b>15</b> | 4-11  |
| Spectra of representative compounds <b>3, 6b, 6d, 6h, 8a, 8b, 8f, 10, 12, 14</b> and <b>15</b>       | 12-33 |
| Literature Reference and Melting Point (Solid compounds) Table for all reported compounds            | 34-37 |
| References                                                                                           | 38    |

## Experimental

### General Remarks

All chemicals were reagent grade and purchased from Aldrich, Alfa Aesar, Merck, Spectrochem and Qualigens and were used without further purification. The reactions were monitored using pre-coated Aluminium TLC plates of silica gel G/UV-254 of 0.25 mm thickness (Merck 60 F-254). Column chromatography was performed using silica gel (60-120) and (100-200). NMR spectra were recorded on a Bruker Avance-II 400FT spectrometer at 400 MHz ( $^1\text{H}$ ) and 100 MHz ( $^{13}\text{C}$ ) in DMSO or  $\text{CDCl}_3$  using TMS as an internal reference. Mass spectra (ESIMS) were obtained on a Waters UPLC-TQD mass spectrometer. IR spectra were recorded on a Thermo Scientific Nicolet iS5 FT-IR spectrometer. Elemental analyses were carried out in a Thermo Scientific (FLASH 2000) CHN Elemental Analyser. Melting points were determined by open glass capillary method and were uncorrected.

## General Experimental Procedure<sup>abc</sup>

To a 50 mL round bottom flask were added *o*-acyl anilines (1 mmol),  $\alpha$ -methylene ketone (1.1 mmol) and malic acid (0.5 mmol) and the resulting mixture was stirred at 55 °C under solvent free conditions. On completion of the reaction (TLC control), the reaction mixture was dissolved in EtOH (2mL) and cold water was added to it whence the solid product which separated out was filtered, washed with water and dried. The crude product was then recrystallized from a mixture of Et<sub>2</sub>O/ hexane to obtain the pure quinolines.

<sup>a</sup>In those instances where required purity could not be achieved through recrystallization, column chromatography (100-200 mesh silica gel; EtOAc/Hexane) was performed to obtain the pure molecules.

<sup>b</sup>In case where quinolines were liquids, the reaction mixture was dissolved in EtOAc and washed with water. The EtOAc layer was separated and the aqueous fraction was extracted with EtOAc (3 x 3mL). The combined organic layers were dried over Na<sub>2</sub>SO<sub>4</sub> and concentrated *in vacuo* to give the crude product which was subjected to column chromatography (100-200 mesh silica gel; EtOAc/Hexane) to afford the pure quinoline derivative.

<sup>c</sup>In those cases where both the *o*-acyl aniline and  $\alpha$ -methylene ketone were solids, a few drops of ethanol was added so as to obtain the reaction mixture in form of a paste.

### Compound 3

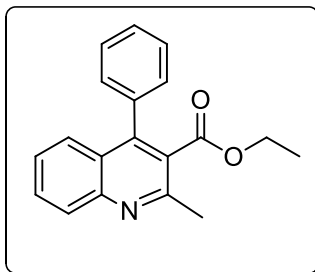

Yield: 96%, 279 mg; White solid; M.P.: 92-95 °C<sup>17b</sup>; IR (KBr, cm<sup>-1</sup>): 2913, 1753, 1682; <sup>1</sup>H NMR (400 MHz, CDCl<sub>3</sub>) (δ, ppm): 8.09 (1H,d, J=8.4 Hz), 7.75-7.71 (1H, m), 7.59 (1H, d, J=8.3), 7.50-7.49 (3H,m), 7.46-7.42 (1H, m), 7.39-7.37 (2H,m), 4.08 (2H, q, J=7.1), 2.81 (3H, s), 0.97 (3H, t, J=7.1) ; <sup>13</sup>C NMR (CDCl<sub>3</sub>) (δ, ppm): 168.4, 154.6, 147.7, 146.2, 135.7, 130.2, 129.4, 128.8, 128.4, 128.2, 127.4, 126.5, 126.4, 125.1, 61.3, 23.8, 13.6; MS (ESI): *m/z* 291; found 292 [M+H]<sup>+</sup>; Anal calcd for C<sub>19</sub>H<sub>17</sub>NO<sub>2</sub>: C 78.33; H 5.88; N 4.81; Found C 78.36, H 5.91, N 4.75%.

### Compound 6b

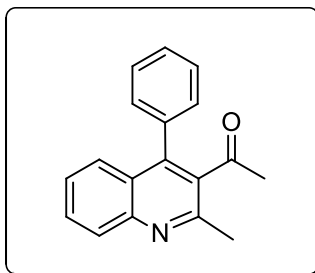

Yield: 90%, 235 mg; White solid; M.P.: 105-110 °C<sup>17a</sup>; IR (KBr, cm<sup>-1</sup>): 3021, 1721, 1590; <sup>1</sup>H NMR (300 MHz, CDCl<sub>3</sub>) (δ, ppm): 8.08 (1H,d, J=8.4 Hz), 7.75-7.70 (1H, m), 7.62 (1H, d, J=8.4), 7.52-7.50 (3H,m), 7.47-7.42 (1H, m), 7.37-7.34(2H,m), 2.70 (3H, s), 2.00 (3H, s); <sup>13</sup>C NMR (CDCl<sub>3</sub>) (δ, ppm): 206.0, 153.7, 147.6, 144.1, 135.3, 134.9, 130.3, 130.2, 129.1, 129.0, 128.9, 126.7, 126.3, 125.2, 32.1, 24.0; MS (ESI): *m/z* 261; found 262 [M+H]<sup>+</sup>; Anal calcd for C<sub>18</sub>H<sub>15</sub>NO: C, 82.73; H, 5.79; N, 5.36; Found C 82.77, H, 5.74, N, 5.32%.

### Compound 6d

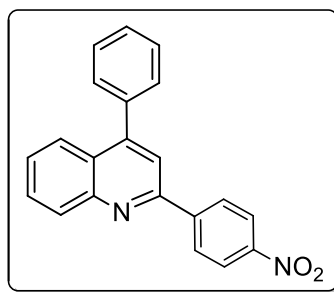

Yield: 72%, 234 mg; Pale yellow solid; M.P.: 160-165 °C<sup>20b</sup>; IR (KBr, cm<sup>-1</sup>): 3043, 3025, 1610, 1500; <sup>1</sup>H NMR (300 MHz, CDCl<sub>3</sub>) (δ, ppm): 8.09 (1H,d, J=8.4 Hz), 7.99-7.90 (5H, m), 7.60 (1H, d, J=8.1), 7.49-7.44 (2H,m), 7.41 (6H, s); <sup>13</sup>C NMR (CDCl<sub>3</sub>) (δ, ppm): 154.0, 149.9, 148.8, 148.3, 145.4, 137.9, 130.4, 130.1, 129.6, 128.8, 128.3, 127.4, 126.2, 125.8, 124.0, 119.1 ; MS (ESI): *m/z* 326; found 327 [M+H]<sup>+</sup>; Anal calcd for C<sub>21</sub>H<sub>14</sub>N<sub>2</sub>O<sub>2</sub>: C, 77.29; H, 4.32; N, 8.58; Found C 77.25, H, 4.30, N, 8.61 %

### Compound 6h

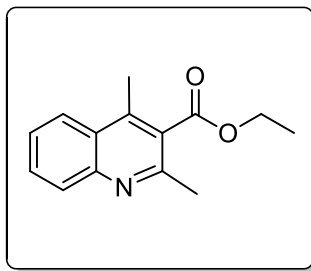

Yield: 94%, 215 mg; Yellow oil; IR (KBr,  $\text{cm}^{-1}$ ): 3021, 1721, 1591, 1300;  $^1\text{H}$  NMR (400 MHz,  $\text{CDCl}_3$ ) ( $\delta$ , ppm): 8.02-7.98 (2H,m), 7.71-7.67 (1H, m), 7.54-7.50 (1H, m), 4.48 (2H, q,  $J=7.1$ ), 2.70 (3H, s), 2.64 (3H, s) ;  $^{13}\text{C}$  NMR ( $\text{CDCl}_3$ ) ( $\delta$ , ppm): 169.1, 154.2, 147.0, 141.3, 129.9, 129.2, 127.9, 126.2, 125.7, 123.9, 61.6, 23.7, 15.6, 14.2; MS (ESI):  $m/z$  229; found 230  $[\text{M}+\text{H}]^+$ ; Anal calcd for  $\text{C}_{14}\text{H}_{15}\text{NO}_2$ : 73.34; H, 6.59; N, 6.11; Found : 73.30; H, 6.56; N, 6.15.

### Compound 8a

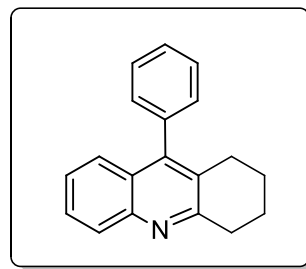

Yield: 98%, 254 mg; White solid; M.P.: 138-142  $^{\circ}\text{C}^{17b}$ ; IR (KBr,  $\text{cm}^{-1}$ ): 3084, 1561, 1476, 1371, 1195;  $^1\text{H}$  NMR (300 MHz,  $\text{CDCl}_3$ ) ( $\delta$ , ppm): 8.01 (1H, d,  $J=8.4$  Hz), 7.62-7.57 (1H, m), 7.54-7.52 (1H, m), 7.50-7.43 (2H, m), 7.32-7.31 (2H, m), 7.27-7.22 (2H, m), 3.20 (2H, t,  $J=6.6$  Hz), 2.60 (2H, t,  $J=6.6$  Hz), 2.01-1.92 (2H, m), 1.82-1.74 (2H, m) ;  $^{13}\text{C}$  NMR ( $\text{CDCl}_3$ ) ( $\delta$ , ppm): 159.2, 146.7,

146.4,137.3, 129.2, 128.8, 128.5, 128.4, 127.9, 126.8, 125.9, 125.5,34.4, 28.2, 23.2, 23.1; MS (ESI):  $m/z$  259; found 260  $[M+H]^+$ ;  
Anal calcd for  $C_{19}H_{17}N$ : C, 87.99; H, 6.61; N, 5.40; Found C, 87.96; H, 6.59; N, 5.45.

### Compound 8b

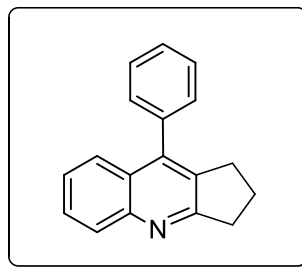

Yield: 96%, 235 mg; White solid; M.P.: 132-136 °C<sup>17b</sup>; IR (KBr,  $cm^{-1}$ ): 3070, 2911, 1565, 1204; <sup>1</sup>H NMR (400 MHz,  $CDCl_3$ ) ( $\delta$ , ppm): 8.08-8.05 (1H, m), 7.63-7.59 (2H, m), 7.53-7.43 (3H, m), 7.38-7.35 (3H, m), 3.23 (2H, t,  $J=7.6$  Hz), 2.90 (2H, t,  $J=7.4$  Hz), 2.15 (2H, p,  $J=7.5$ ); <sup>13</sup>C NMR ( $CDCl_3$ ) ( $\delta$ , ppm): 167.4, 147.9, 142.6, 136.7, 133.6, 129.3, 128.8, 128.5, 128.2, 127.9, 126.2, 125.6, 125.4, 35.2, 30.3, 23.5; MS (ESI):  $m/z$  245; found 246  $[M+H]^+$ ; Anal calcd for  $C_{18}H_{15}N$ : C, 88.13; H, 6.16; N, 5.71; Found 88.17; H, 6.20; N, 5.74 %

### Compound 8f

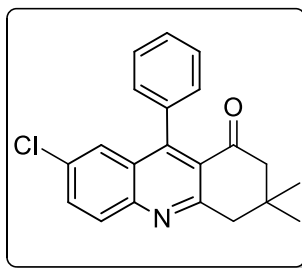

Yield: 78%, 261 mg; Yellow solid; M.P.: 213-217 °C<sup>20a</sup>; IR (KBr, cm<sup>-1</sup>): 3071, 2870, 1560; <sup>1</sup>H NMR (400 MHz, CDCl<sub>3</sub>) (δ, ppm): 7.91 (1H, d, J= 8.9 Hz), 7.60 (1H, dd, J= 8.9, 2.2 Hz), 7.46-7.41 (3H, m), 7.34 (1H, d, J= 2.2 Hz), 7.09-7.06 (2H, m), 3.17 (2H, s), 2.48 (2H, s), 1.07 (6H, s); <sup>13</sup>C NMR (CDCl<sub>3</sub>) (δ, ppm): 197.7, 161.4, 150.1, 147.4, 136.8, 132.5, 132.4, 130.2, 128.3, 128.2, 128.0, 127.9, 126.7, 123.3, 54.1, 48.3, 32.2, 28.3; MS (ESI): *m/z* 335; found 336 [M+H]<sup>+</sup>; Anal calcd for C<sub>21</sub>H<sub>18</sub>ClNO: C, 75.11; H, 5.40; N, 4.17; Found C, 75.07; H, 5.38; N, 4.21

### Compound 10

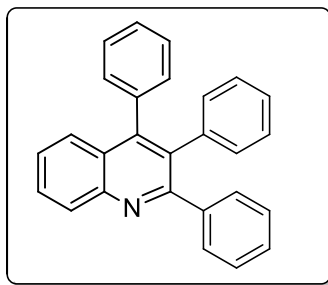

To a 50 mL round bottom flask was added 2-aminobenzophenone (1 mmol), 2-phenyl acetophenone (1.1 mmol) and malic acid (0.8 mmol) and the resulting mixture was stirred at 80 °C under solvent free conditions. On completion of the reaction (6.5h, TLC control),



the reaction mixture was dissolved in EtOH (2mL) and cold water was added to it whence the solid product which separated out was filtered, washed with water and dried. The crude product was chromatographed (hexane/ethyl acetate, 19:1) to yield the pure 2, 3, 4-triphenyl quinoline (**10**) as a white solid. Yield: 76%, 271 mg; M.P.: 190-195°C<sup>5c</sup>; IR (KBr, cm<sup>-1</sup>):2923, 1549, 1480, 1433; <sup>1</sup>H NMR (400 MHz, CDCl<sub>3</sub>) (δ, ppm): 8.27-8.24 (1H, m), 7.74-7.70 (1H, m), 7.59-7.57 (1H, m), 7.47-7.43 (1H, m), 7.39-7.36 (2H, m), 7.28-7.25 (3H, m), 7.22-7.19 (3H, m), 7.14-7.12 (2H, m), 7.00-6.99 (3H, m), 6.90-6.87 (2H, m); <sup>13</sup>C NMR (CDCl<sub>3</sub>) (δ, ppm): 159.0, 147.6, 147.3, 141.1, 138.3, 136.9, 132.9, 131.3, 130.3, 129.9, 129.7, 129.3, 127.8, 127.69, 127.61, 127.3, 127.2, 126.68, 126.64, 126.5,126.3; MS (ESI): *m/z* 357; found 358 [M+H]<sup>+</sup>; Anal calcd for C<sub>27</sub>H<sub>19</sub>N: C 90.72 , H 5.36, N 3.92 %; Found C 90.70, H 5.41, N 3.88%.

## Compound 12

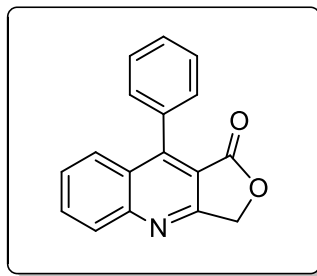

To a 50 mL round bottom flask were added 2-aminobenzophenone (1 mmol), tetronic acid (1.1 mmol) and malic acid (0.65 mmol) and the resulting mixture was stirred at 70 °C under solvent free conditions. On completion of the reaction (3.5h, TLC control), the crude product was then recrystallized from a mixture of Et<sub>2</sub>O/hexane to obtain the pure furoquinoline derivative **12** as a white solid. Yield 81%, 211 mg ; M.P.: 193-197 °C<sup>29</sup> IR (KBr, cm<sup>-1</sup>): 3266, 1788, 1646; <sup>1</sup>H NMR (300 MHz, CDCl<sub>3</sub>) (δ, ppm): 8.2 (2H, d, J= 8.4), 7.92-7.87 (2H, m), 7.61-7.57 (4H, m), 7.47-7.44 (2H, m), 5.44 (2H, s); <sup>13</sup>C NMR (CDCl<sub>3</sub>) (δ, ppm): 168.0, 163.7, 151.6, 151.3, 132.7, 131.7, 129.9, 129.6, 129.4, 128.4, 128.2, 127.5, 127.1, 113.6, 69.7; MS (ESI): *m/z* 261; found 262 [M+H]<sup>+</sup>, Anal calcd for C<sub>17</sub>H<sub>11</sub>NO<sub>2</sub>: C,78.15; H, 4.24; N, 5.36;Found C,78.19; H, 4.25; N, 5.38%.

## Compound 14

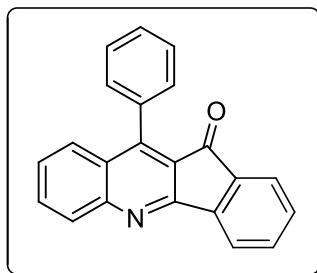

To a 50 mL round bottom flask were added 2-aminobenzophenone or 2- aminoacetophenone (1 mmol), 1, 3-Indanedione (1.1 mmol) and malic acid (0.65 mmol) and the resulting mixture was stirred at 70 °C under solvent free conditions. On completion of the reaction (2.5h in case of **14** and 2.4 h in case of **15** , TLC control). The crude product was then recrystallized from a mixture of Et<sub>2</sub>O/ hexane to obtain the pure indeno[2,1*b*] quinoline **14** as a yellowish green solid and indeno[2,1*b*] quinoline **15** as an olive green solid respectively. Yield: 78%, 239 mg; M.P.: 182-187 °C<sup>18b</sup>; IR (KBr, cm<sup>-1</sup>): 3073, 3043, 1711, 1606; <sup>1</sup>H NMR (300 MHz, CDCl<sub>3</sub>) (δ, ppm): 8.18-8.13 (2H, m), 7.81-7.63 (4H, m), 7.58-7.56 (3H, m), 7.52-7.49 (1H, m), 7.45-7.41 (3H, m); <sup>13</sup>C NMR (CDCl<sub>3</sub>) (δ, ppm): 190.4, 162.2, 150.5, 148.3, 143.4, 137.7, 135.5, 133.0, 131.9, 131.8, 130.0, 129.6, 129.1, 128.8, 128.3, 127.9, 127.3, 124.0, 123.0, 121.9; MS (ESI): *m/z* 307; found 308 [M+H]<sup>+</sup>, Anal calcd for C<sub>22</sub>H<sub>13</sub>NO: C 85.97; H , 4.26; N 4.56, Found C 86.01, H 4.30, N 4.53%.

## Compound 15

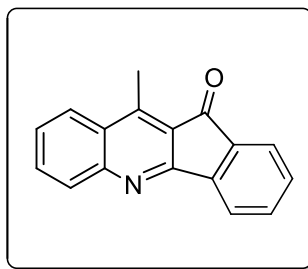

Yield: 81%, 199 mg; M.P.: 283-288°C; IR (KBr,  $\text{cm}^{-1}$ ): 3069, 3015, 1710, 1648;  $^1\text{H}$  NMR (300 MHz,  $\text{CDCl}_3$ ) ( $\delta$ , ppm): 8.06-8.02 (3H, m), 7.77-7.73 (1H, m), 7.71-7.66 (1H, m), 7.63-7.61 (1H, m), 7.53-7.45 (2H, m), 3.00 (1H, s);  $^{13}\text{C}$  NMR ( $\text{CDCl}_3$ ) ( $\delta$ , ppm): 192.8, 162.0, 149.6, 146.8, 143.2, 137.7, 135.4, 131.7, 131.5, 130.3, 128.7, 127.0, 125.9, 123.9, 121.8, 12.6; MS (ESI):  $m/z$  245; found 246  $[\text{M}+\text{H}]^+$ , Anal calcd for  $\text{C}_{17}\text{H}_{11}\text{NO}$ : C, 83.25; H, 4.52; N, 5.71; Found C, 83.21; H, 4.57; N, 5.70%.

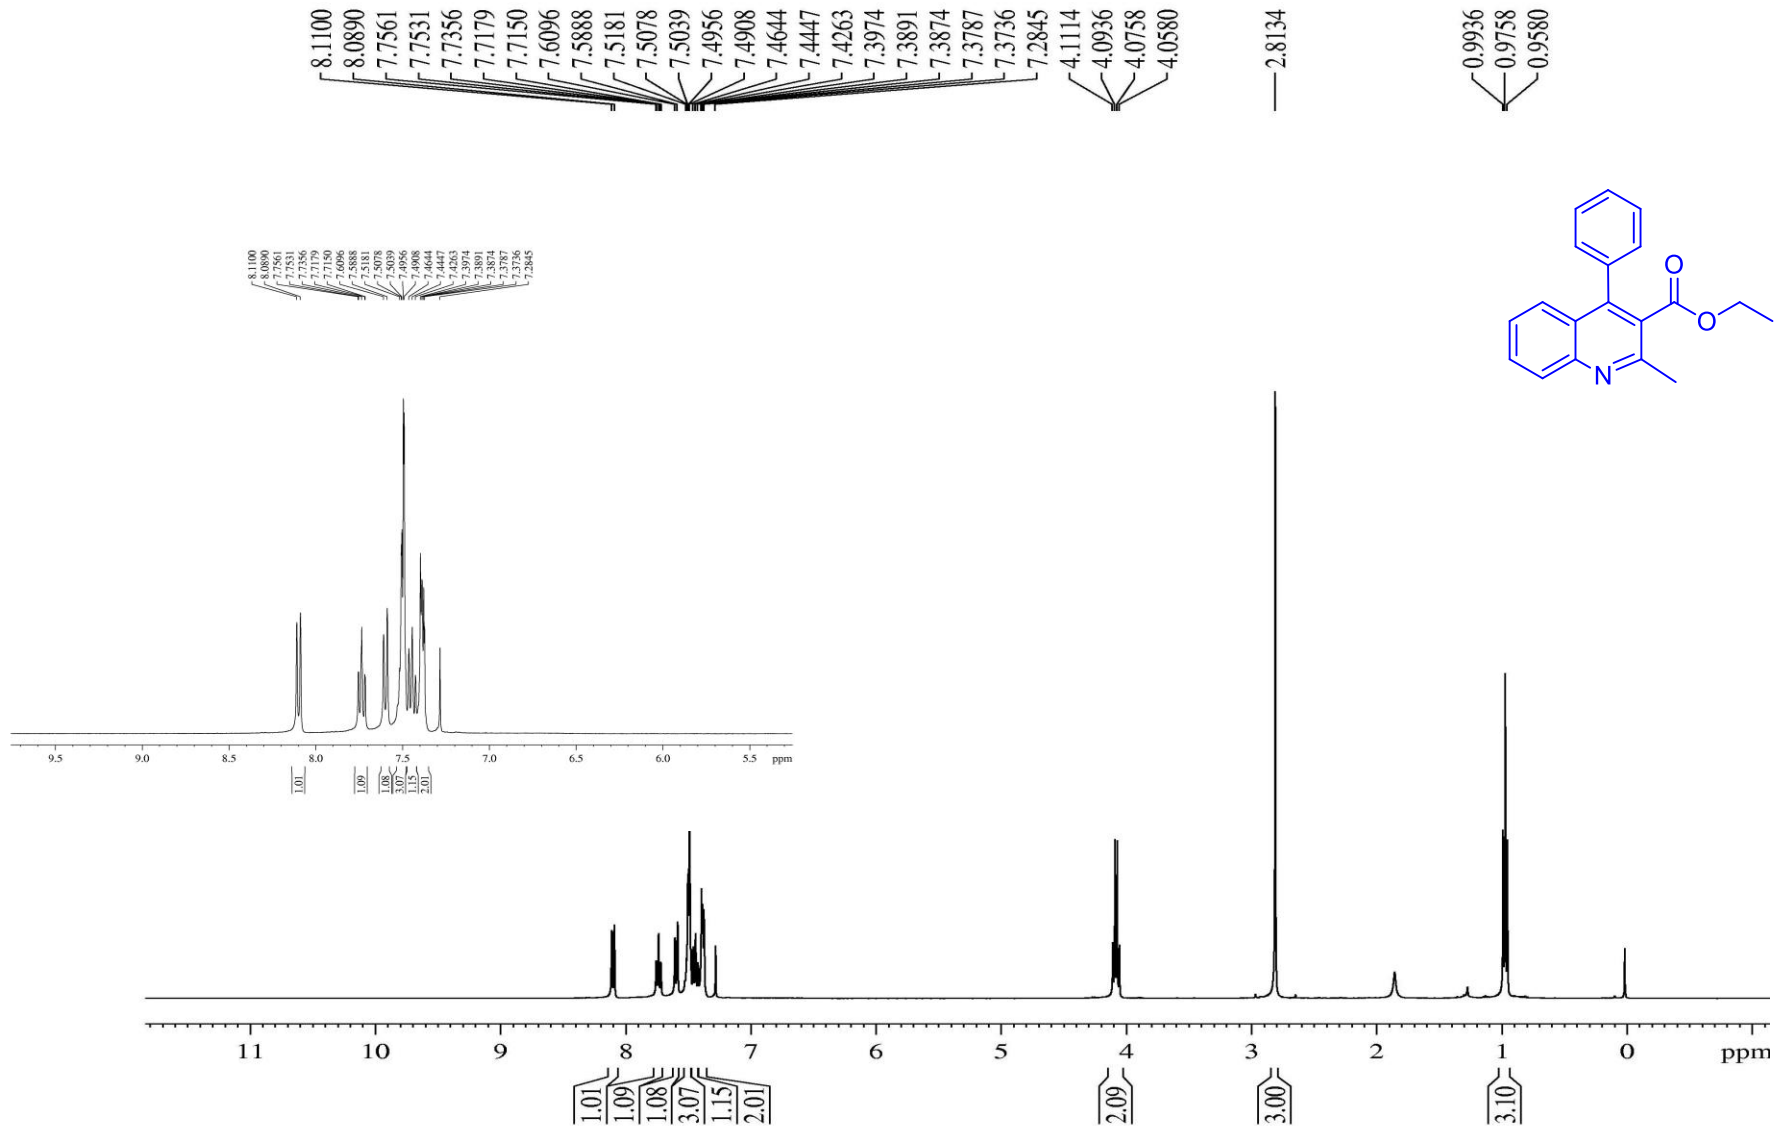

<sup>1</sup>H NMR spectrum of compound **3** and its expansion

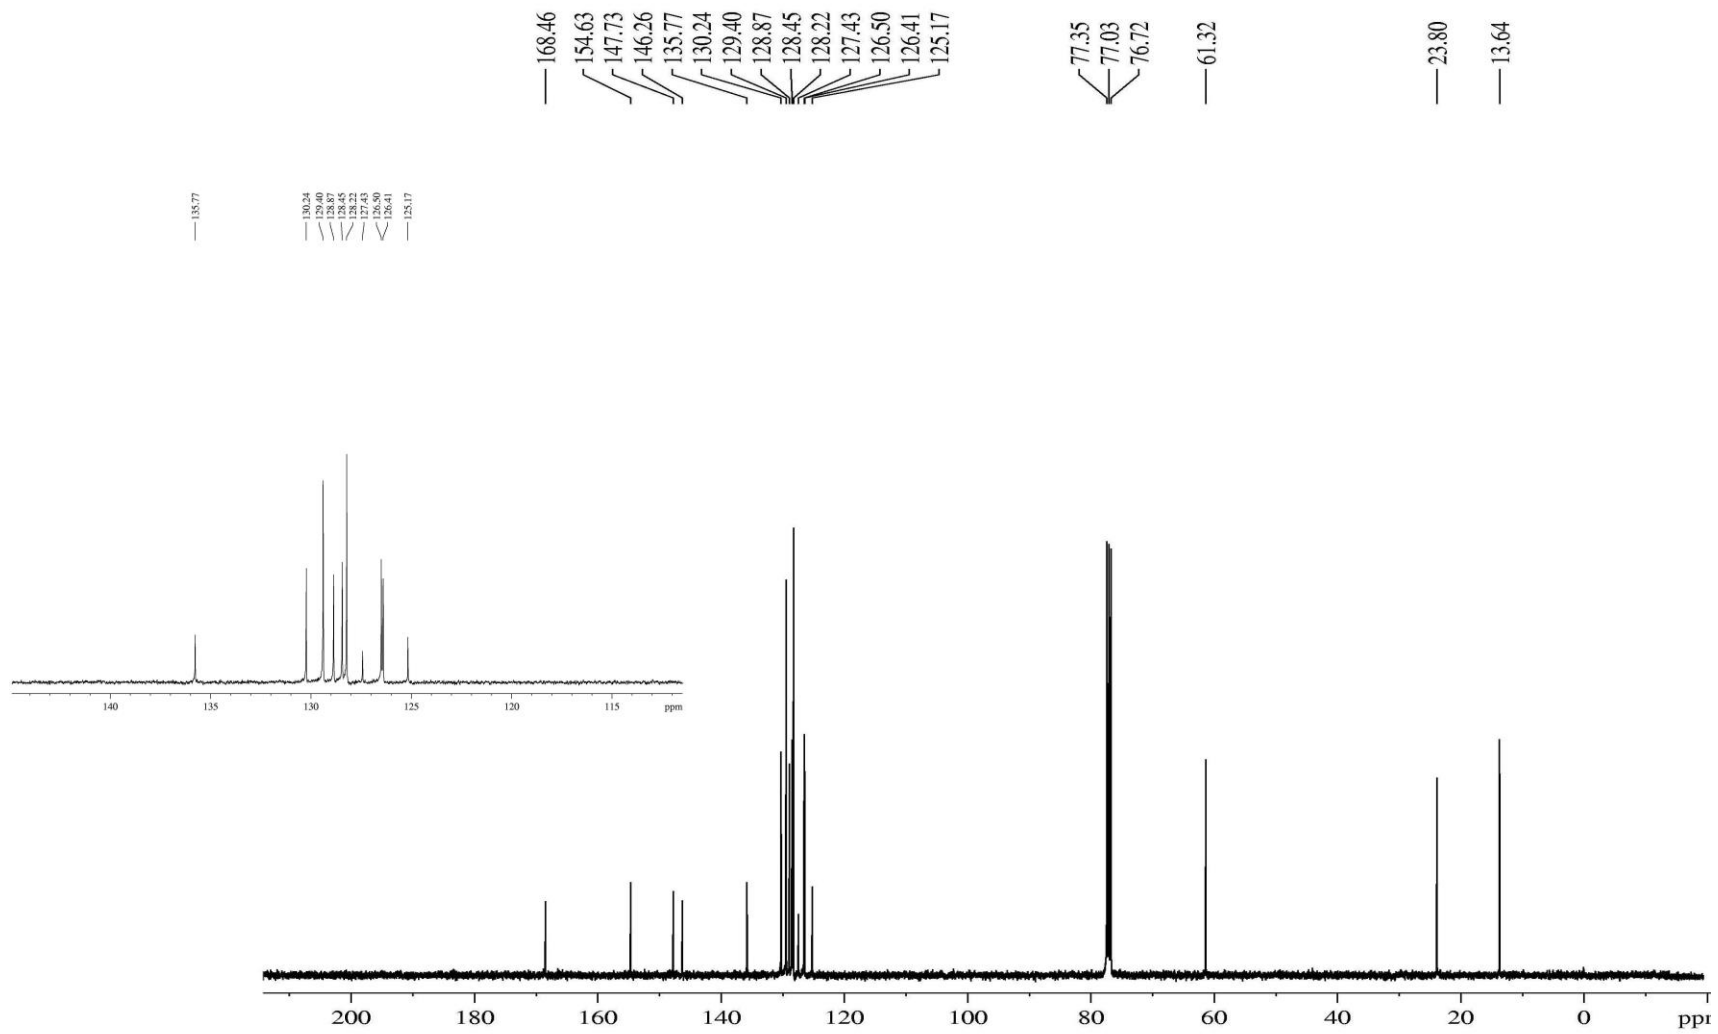

$^{13}\text{C}$  NMR spectrum of compound **3** and its expansion

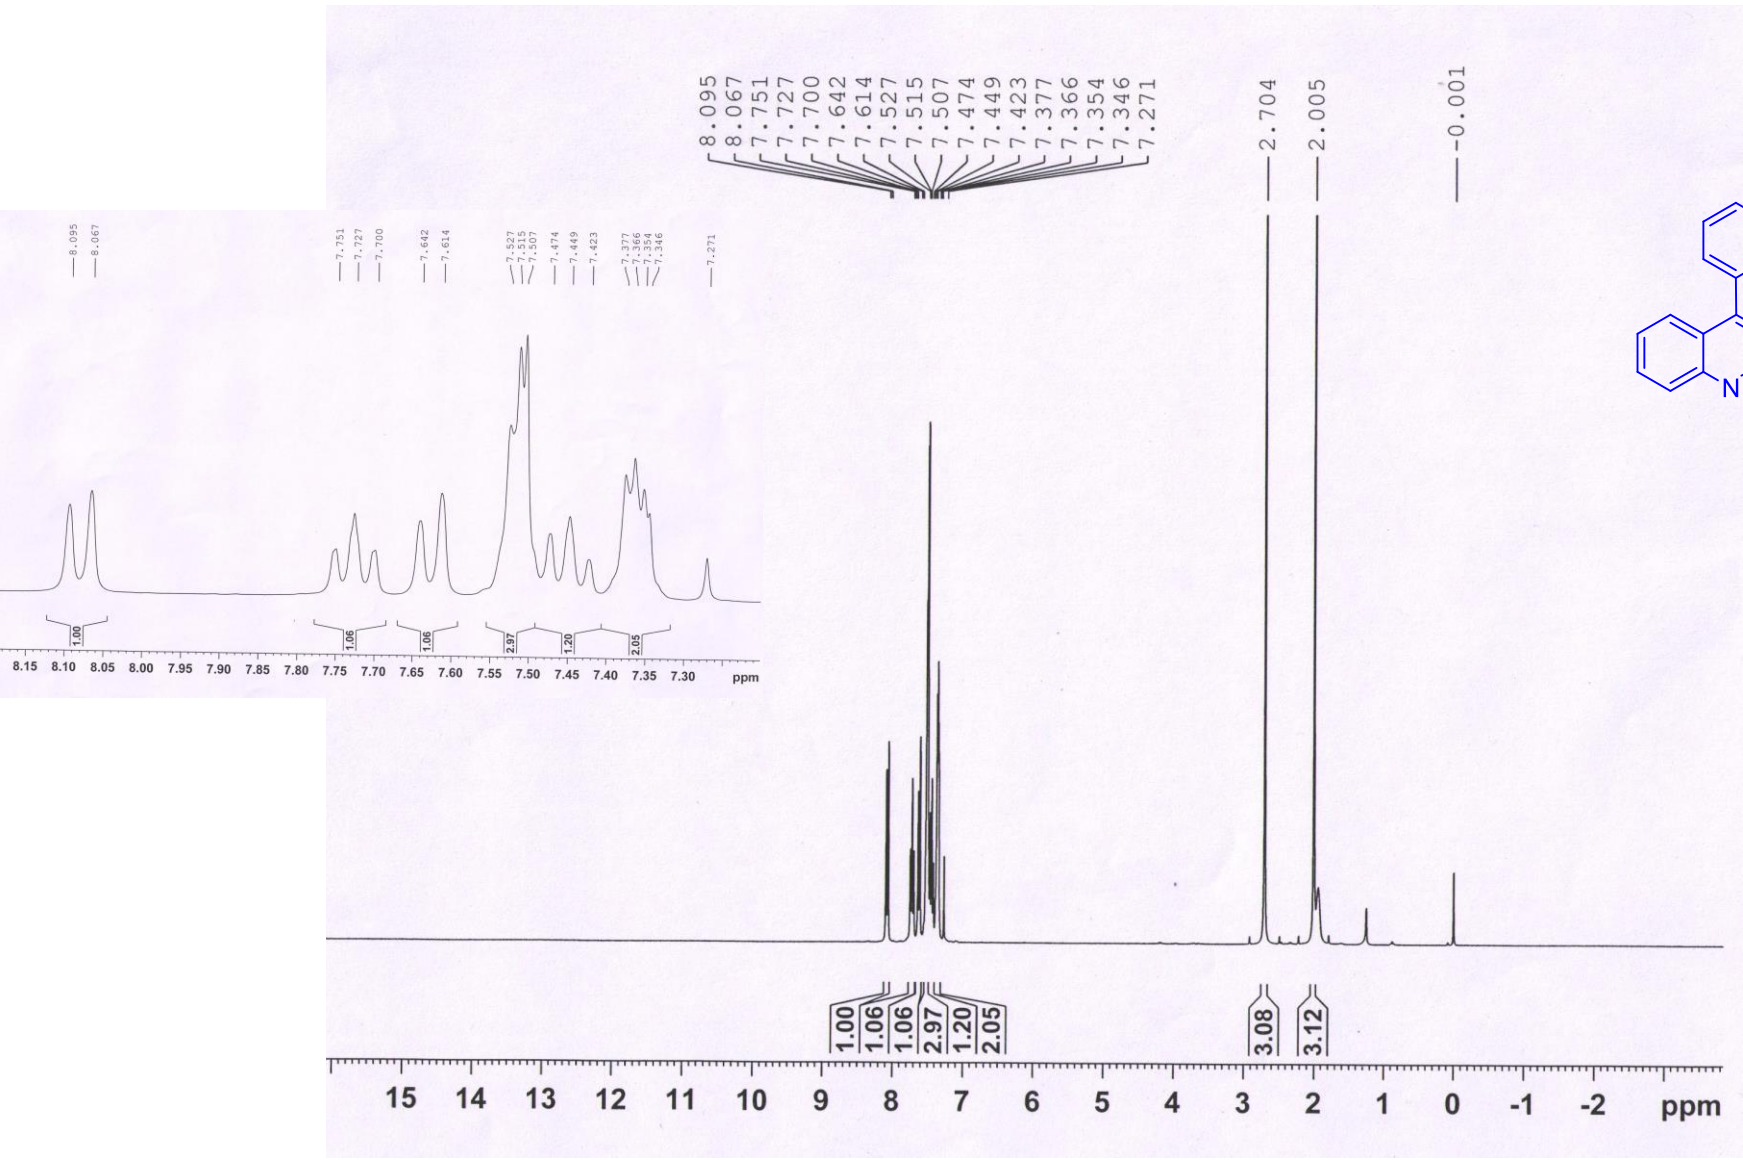

<sup>1</sup>H NMR spectrum of compound **6b** and its expansion

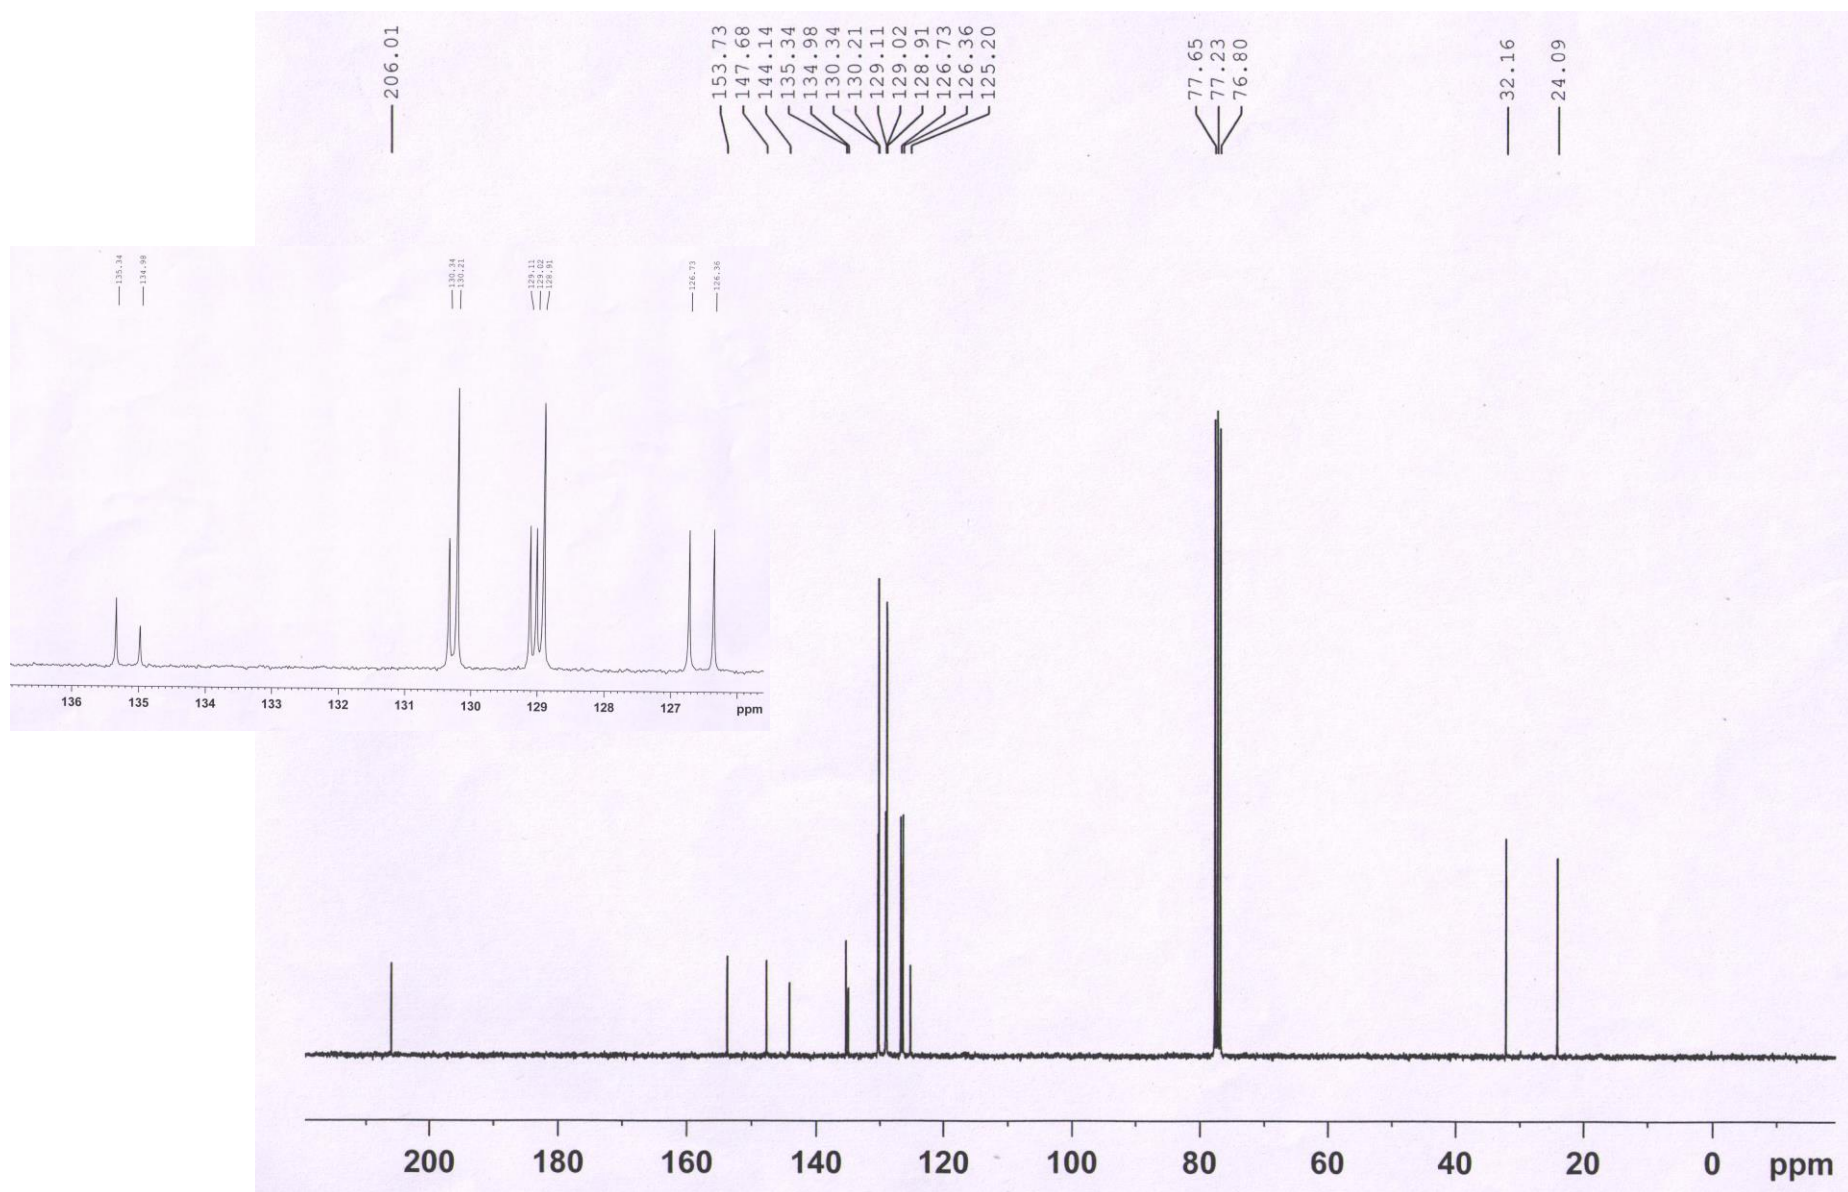

$^{13}\text{C}$  NMR spectrum of compound **6b** and its expansion

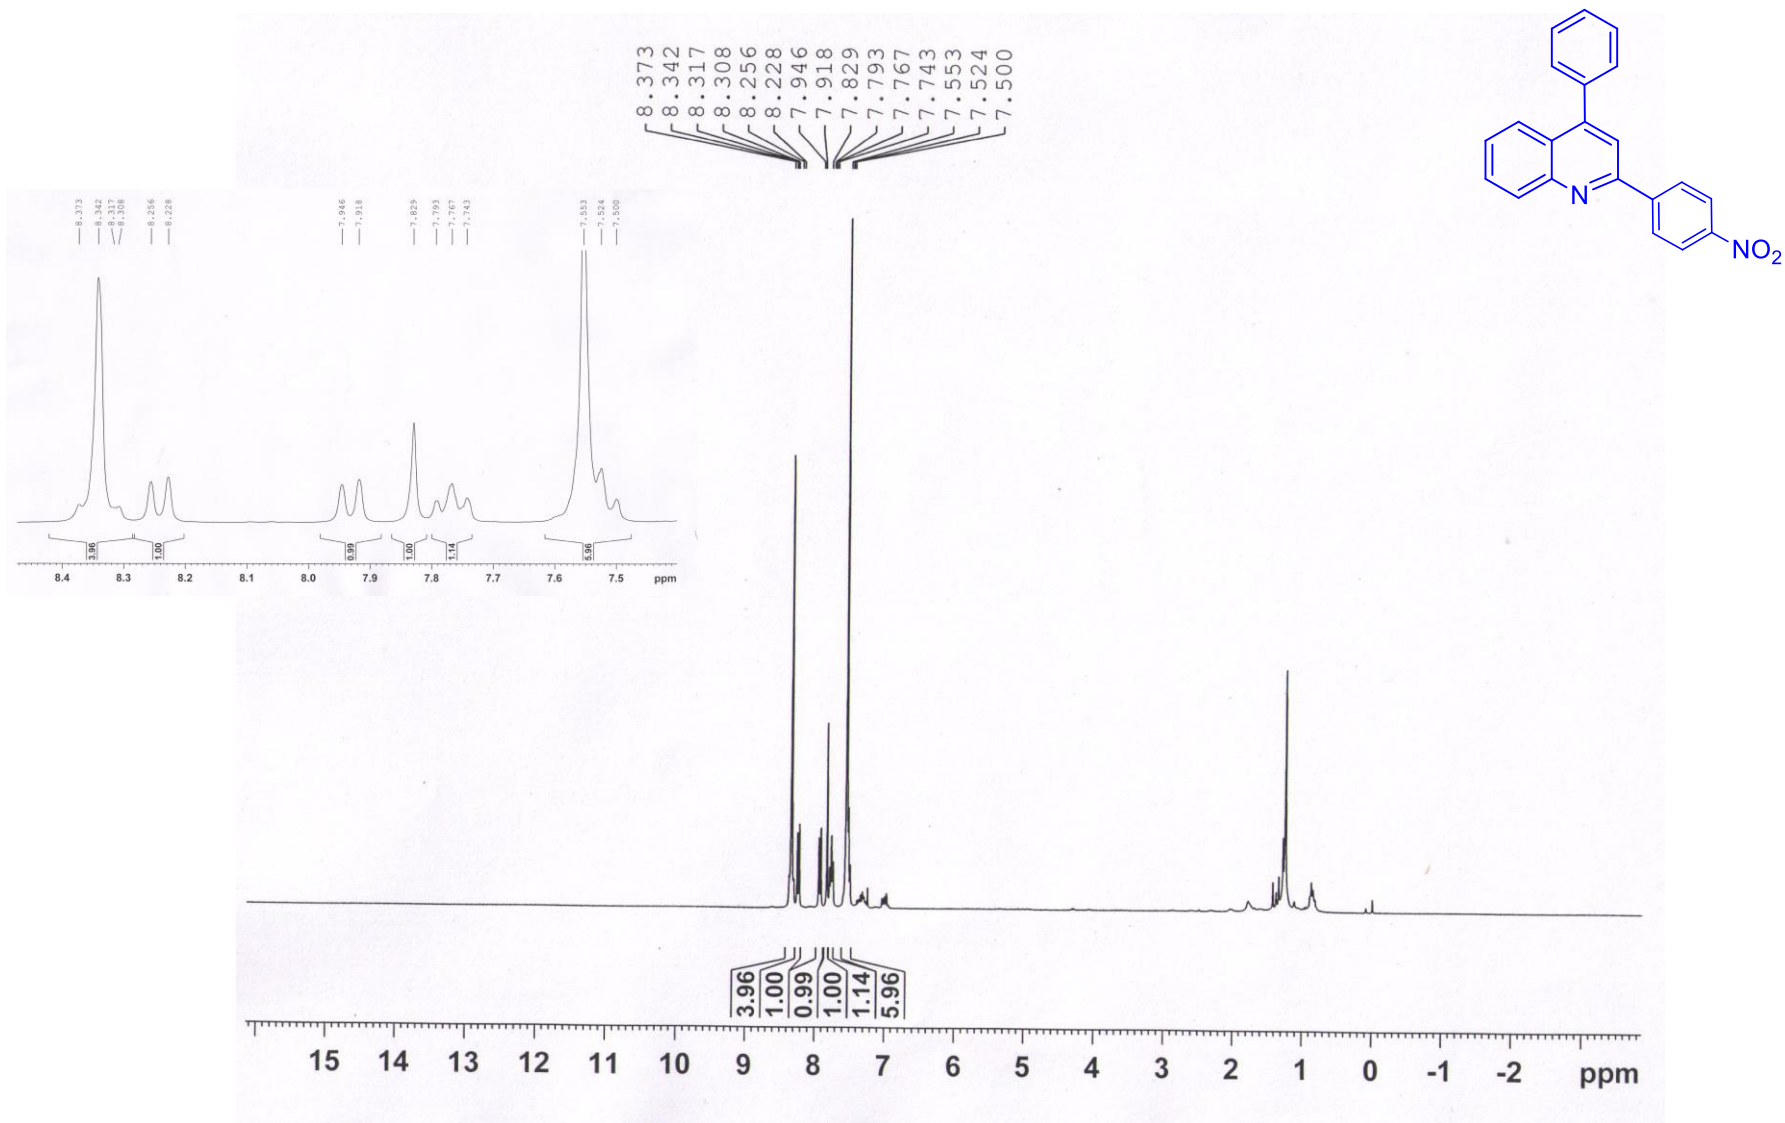

$^1\text{H}$  NMR spectrum of compound **6d** and its expansion



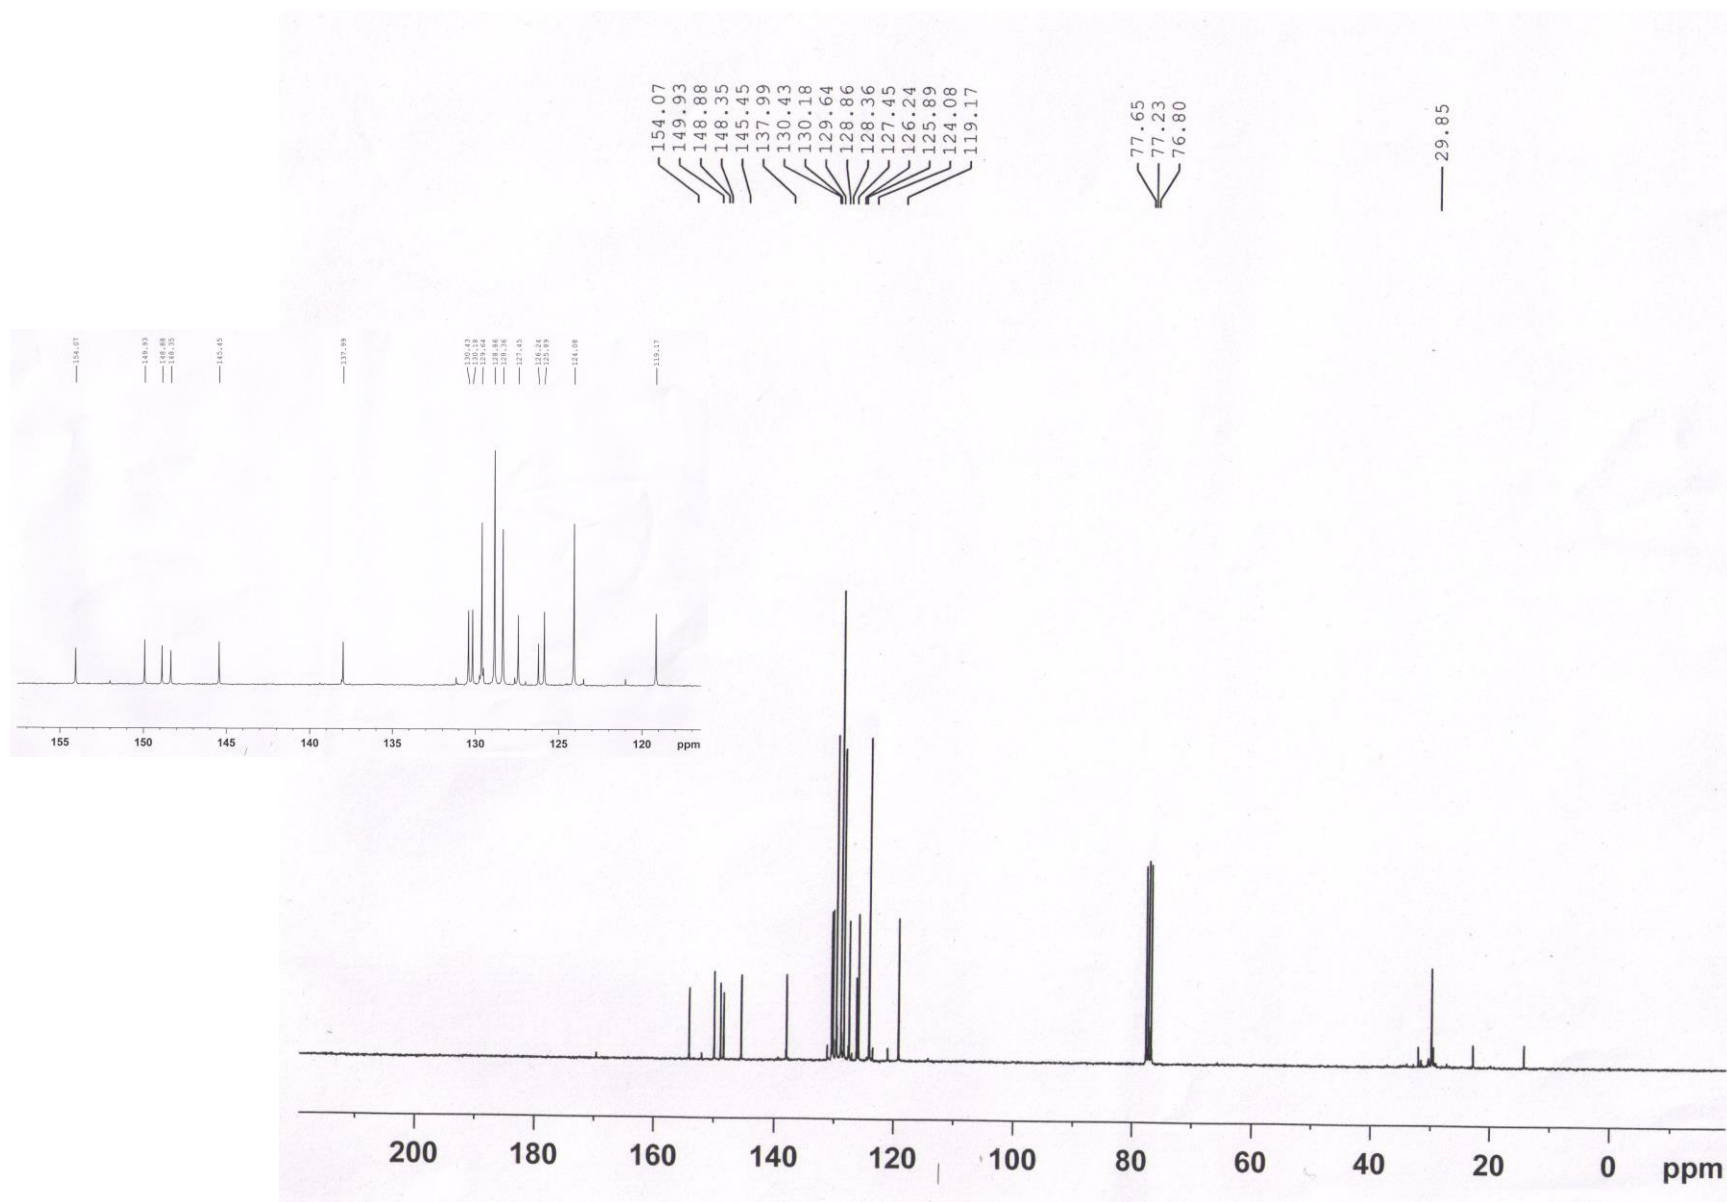

$^{13}\text{C}$  NMR spectrum of compound **6d** and its expansion

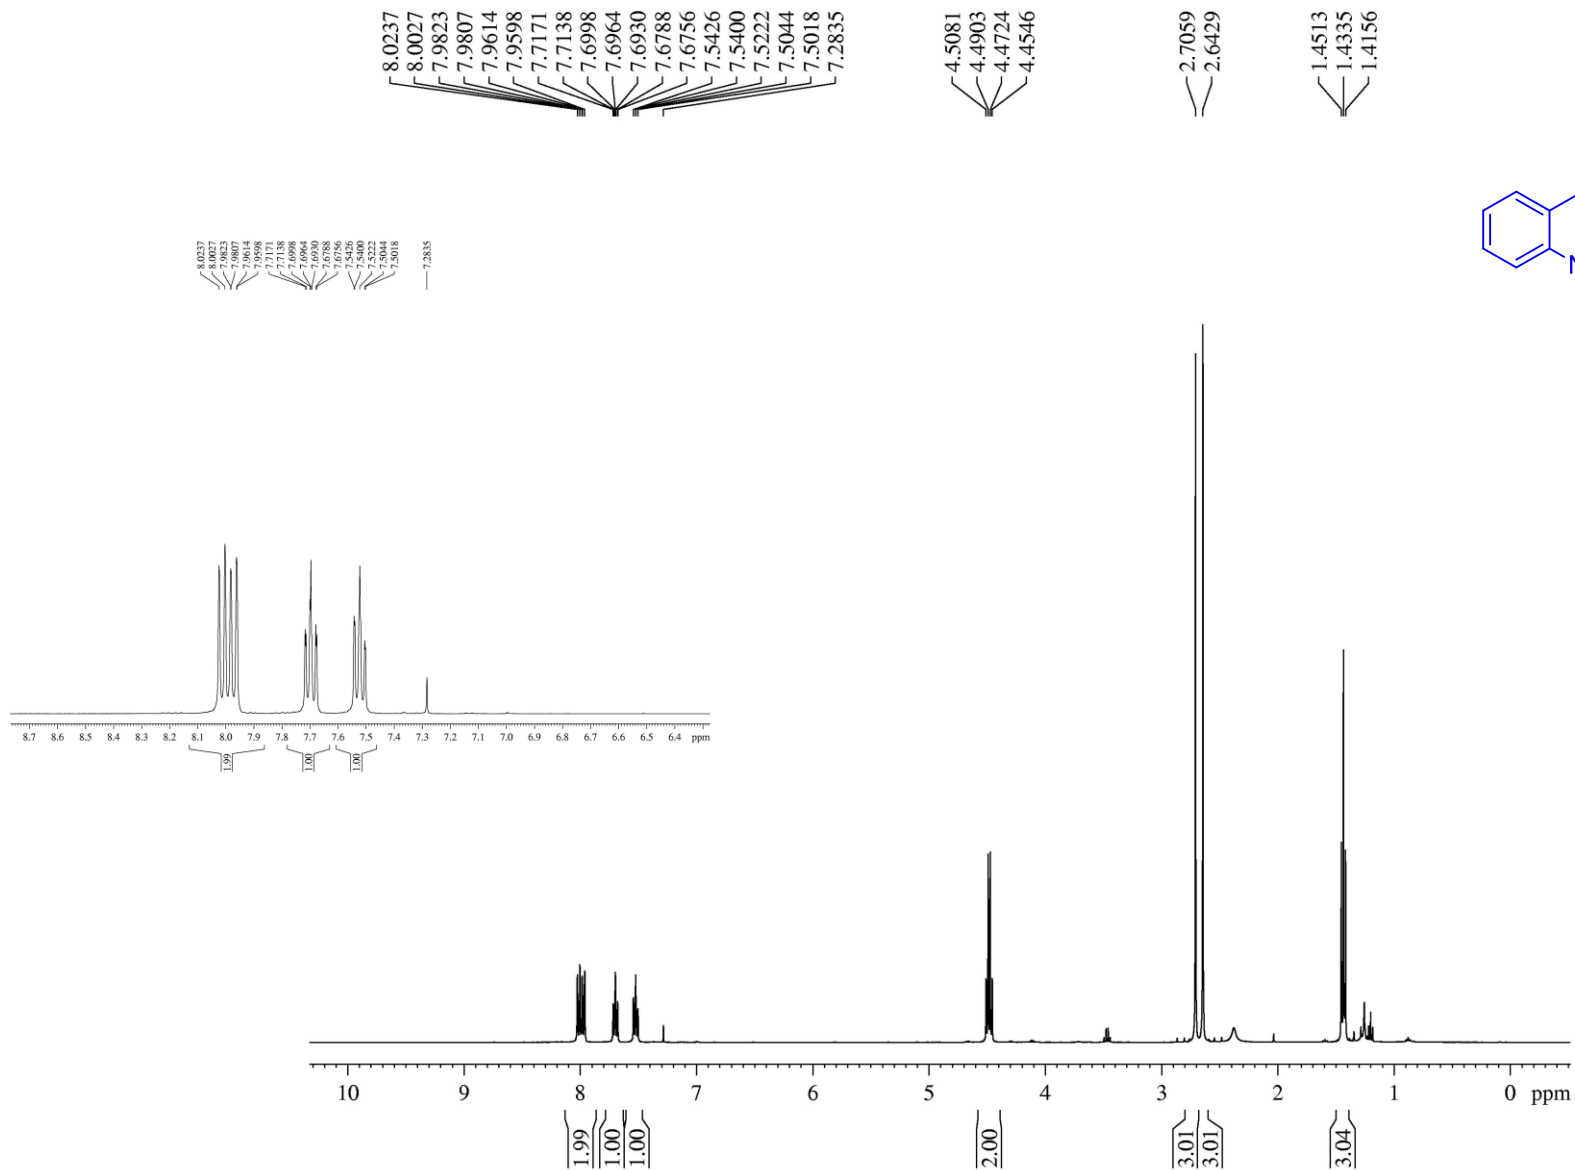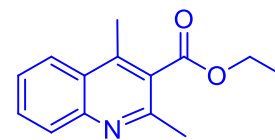

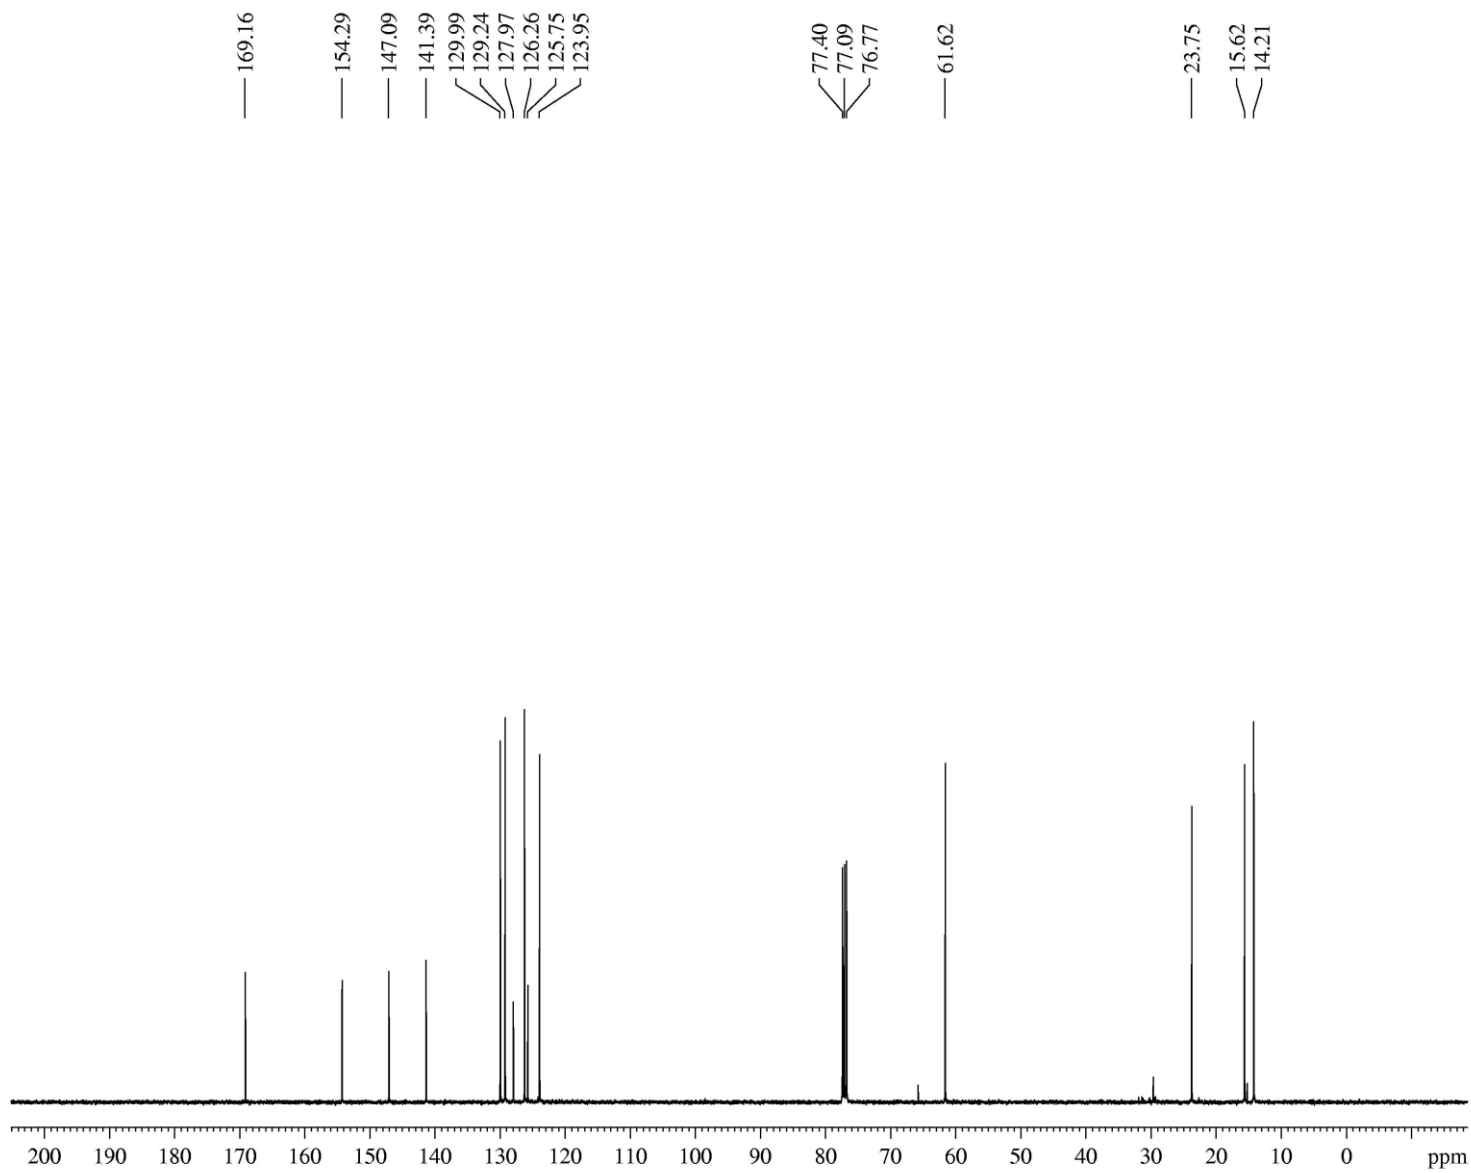

$^{13}\text{C}$  NMR spectrum of compound **6h**

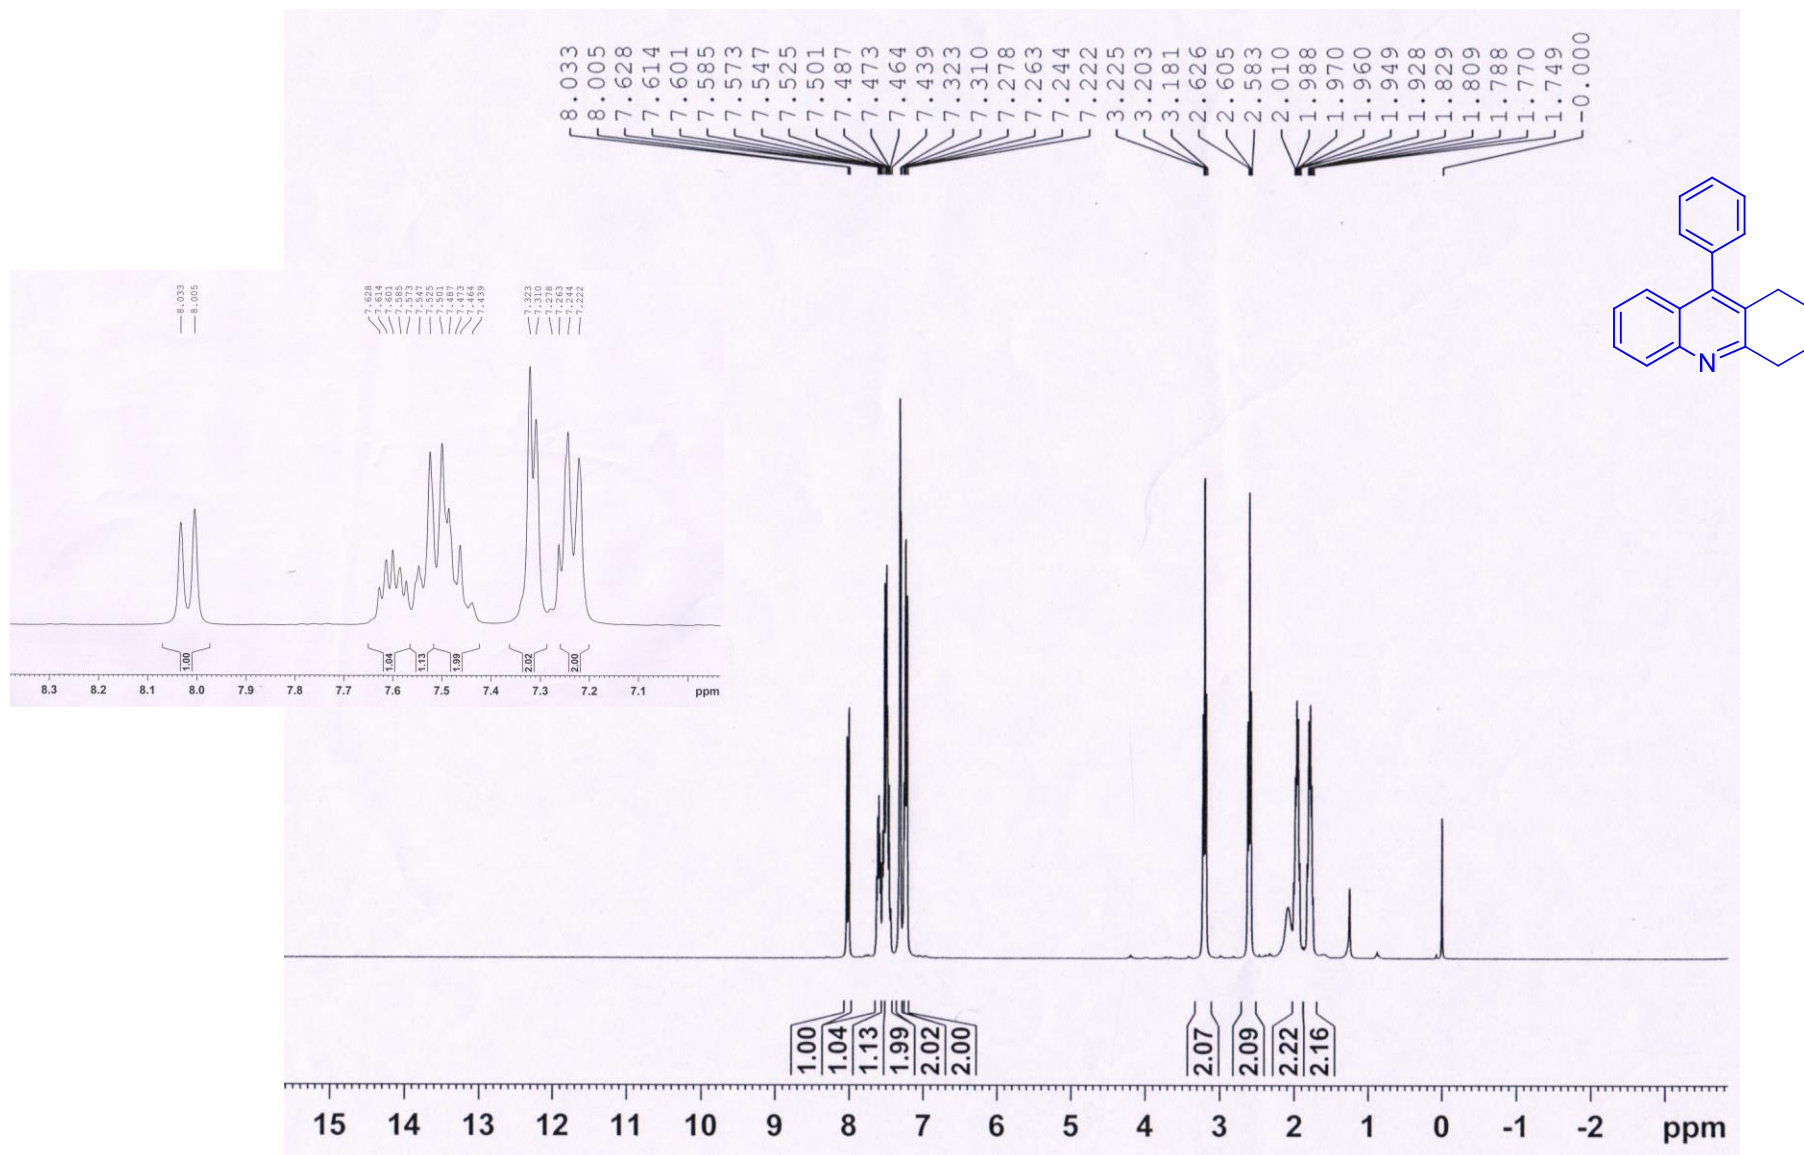

$^1\text{H}$  NMR spectrum of compound **8a** and its expansion

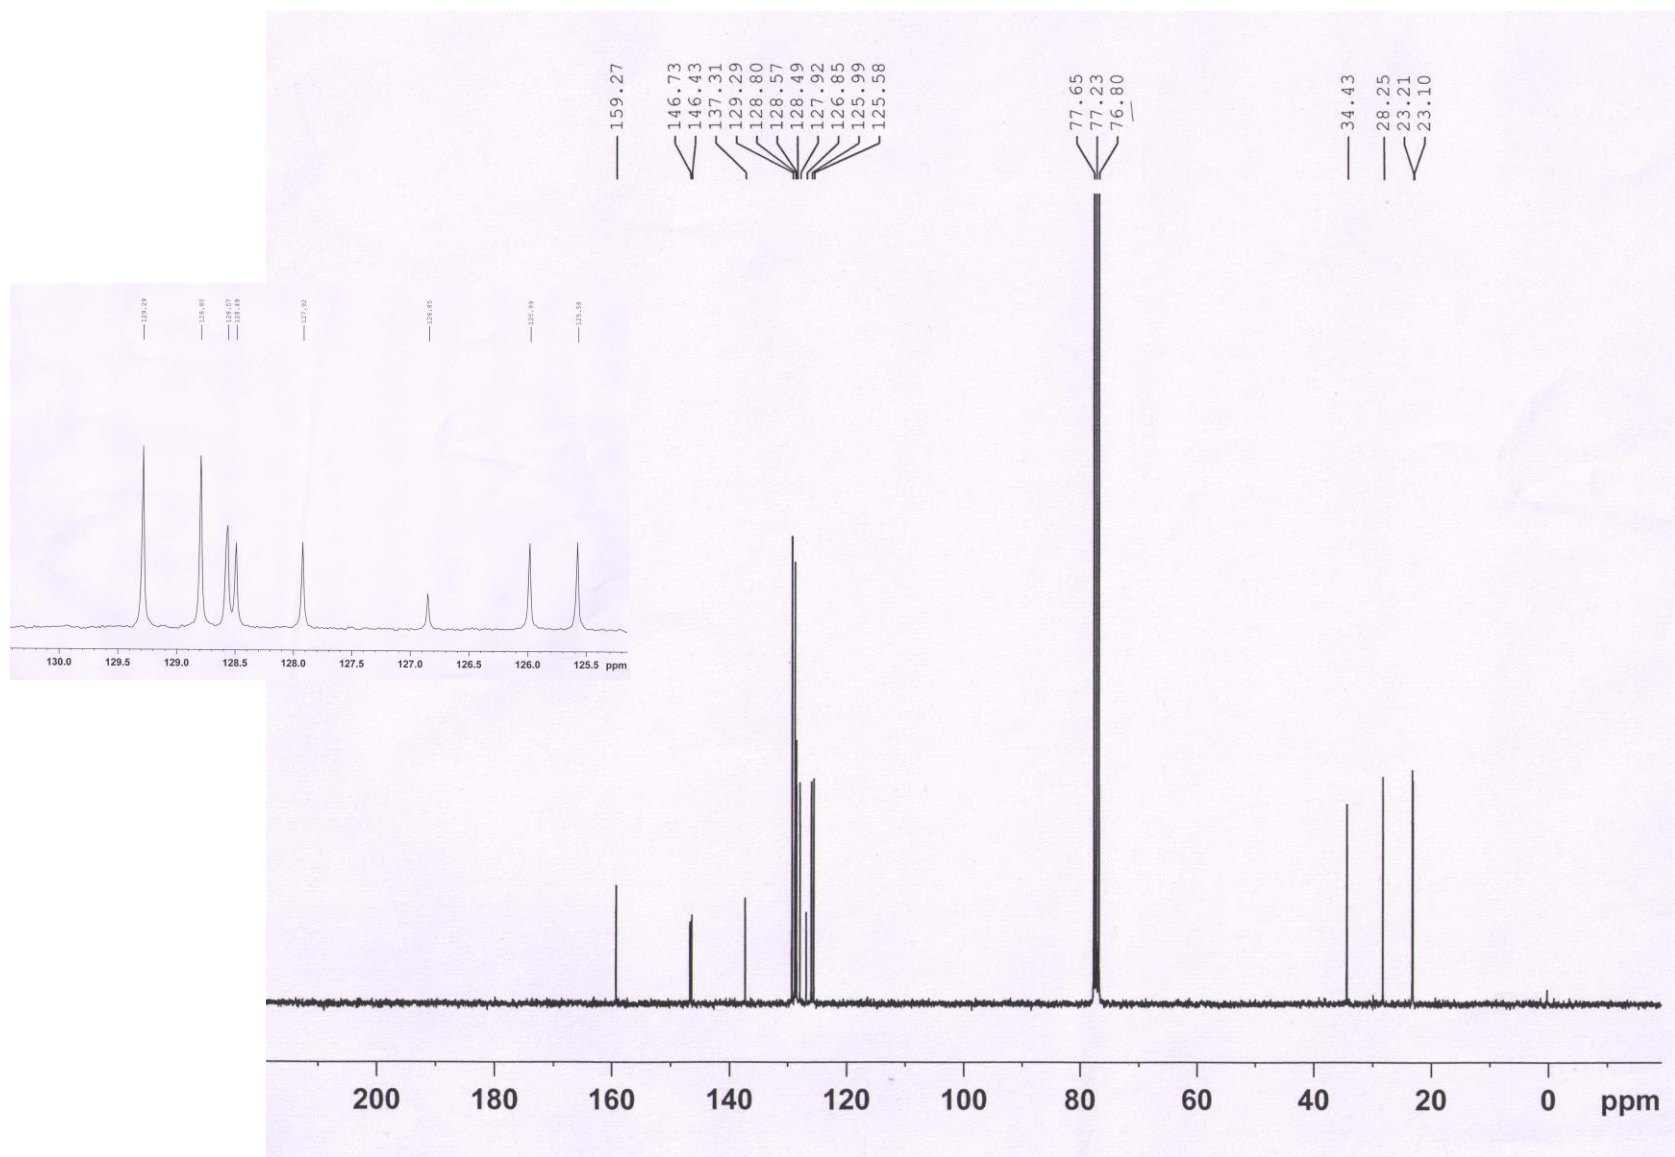

$^{13}\text{C}$  NMR spectrum of compound **8a** and its expansion

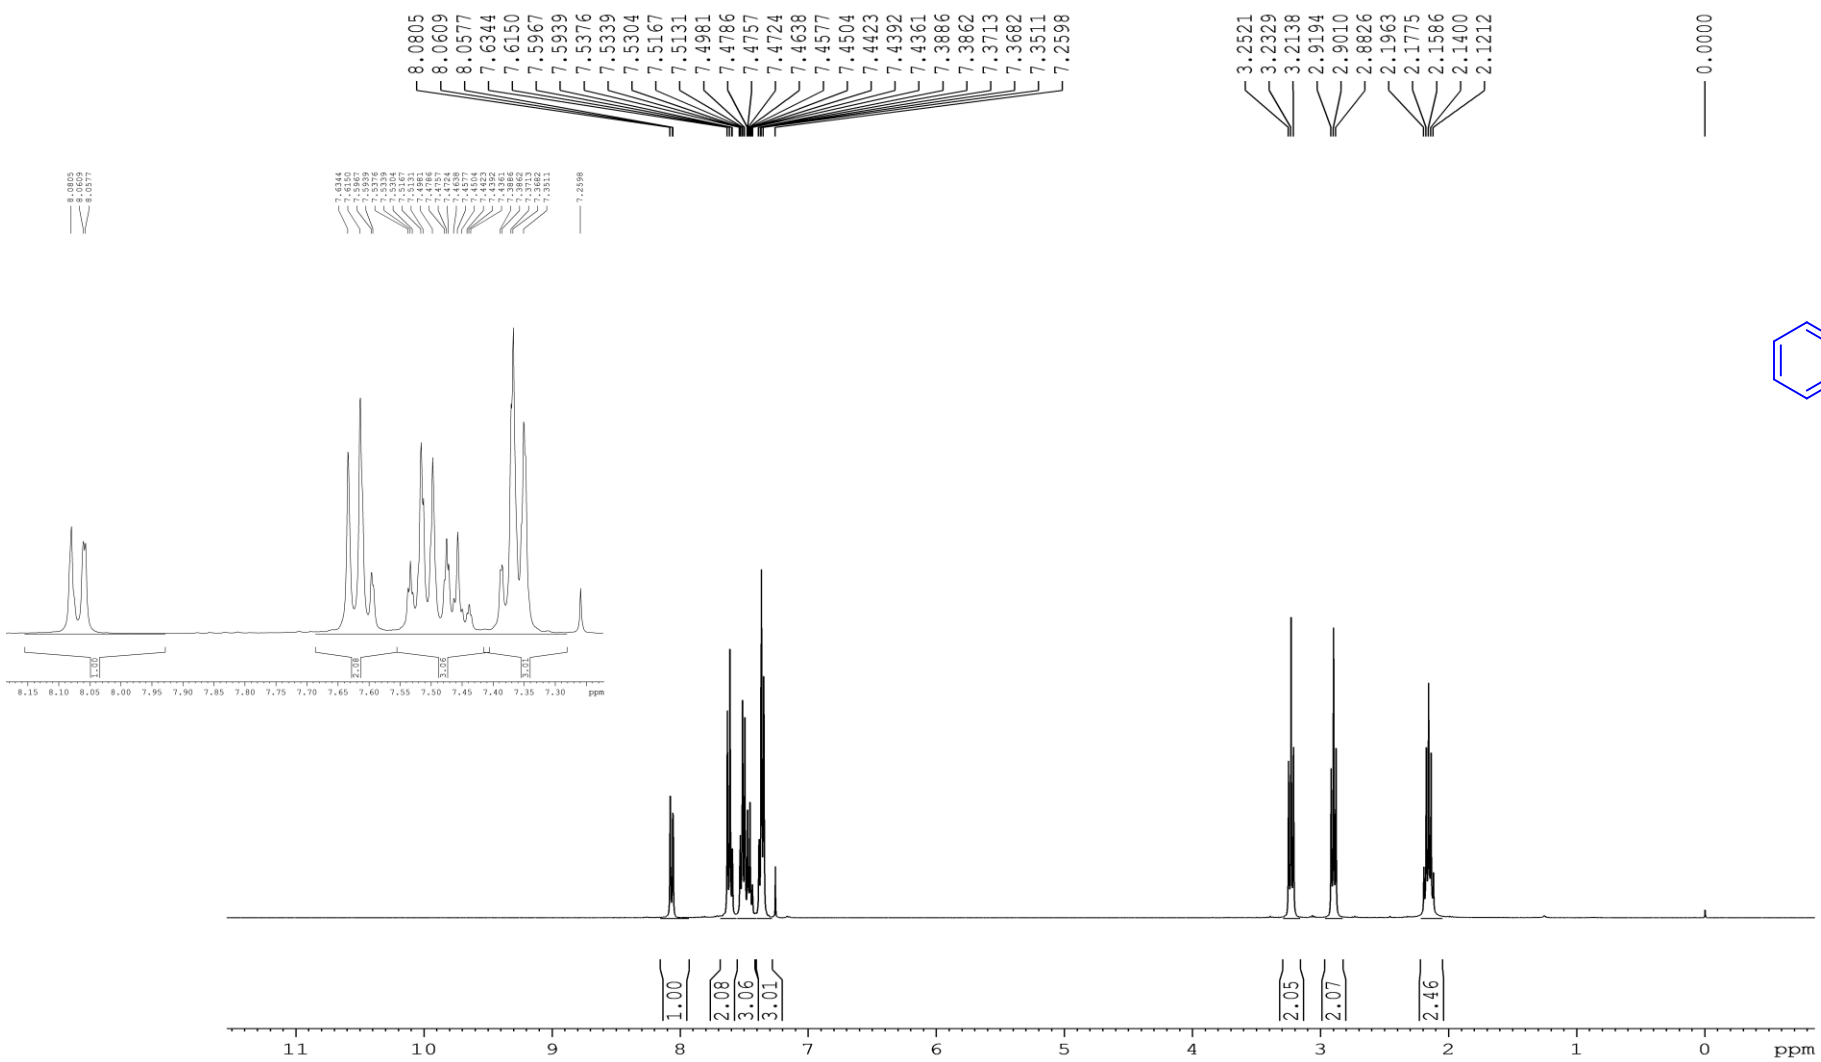

$^1\text{H}$  NMR spectrum of compound **8b** and its expansion

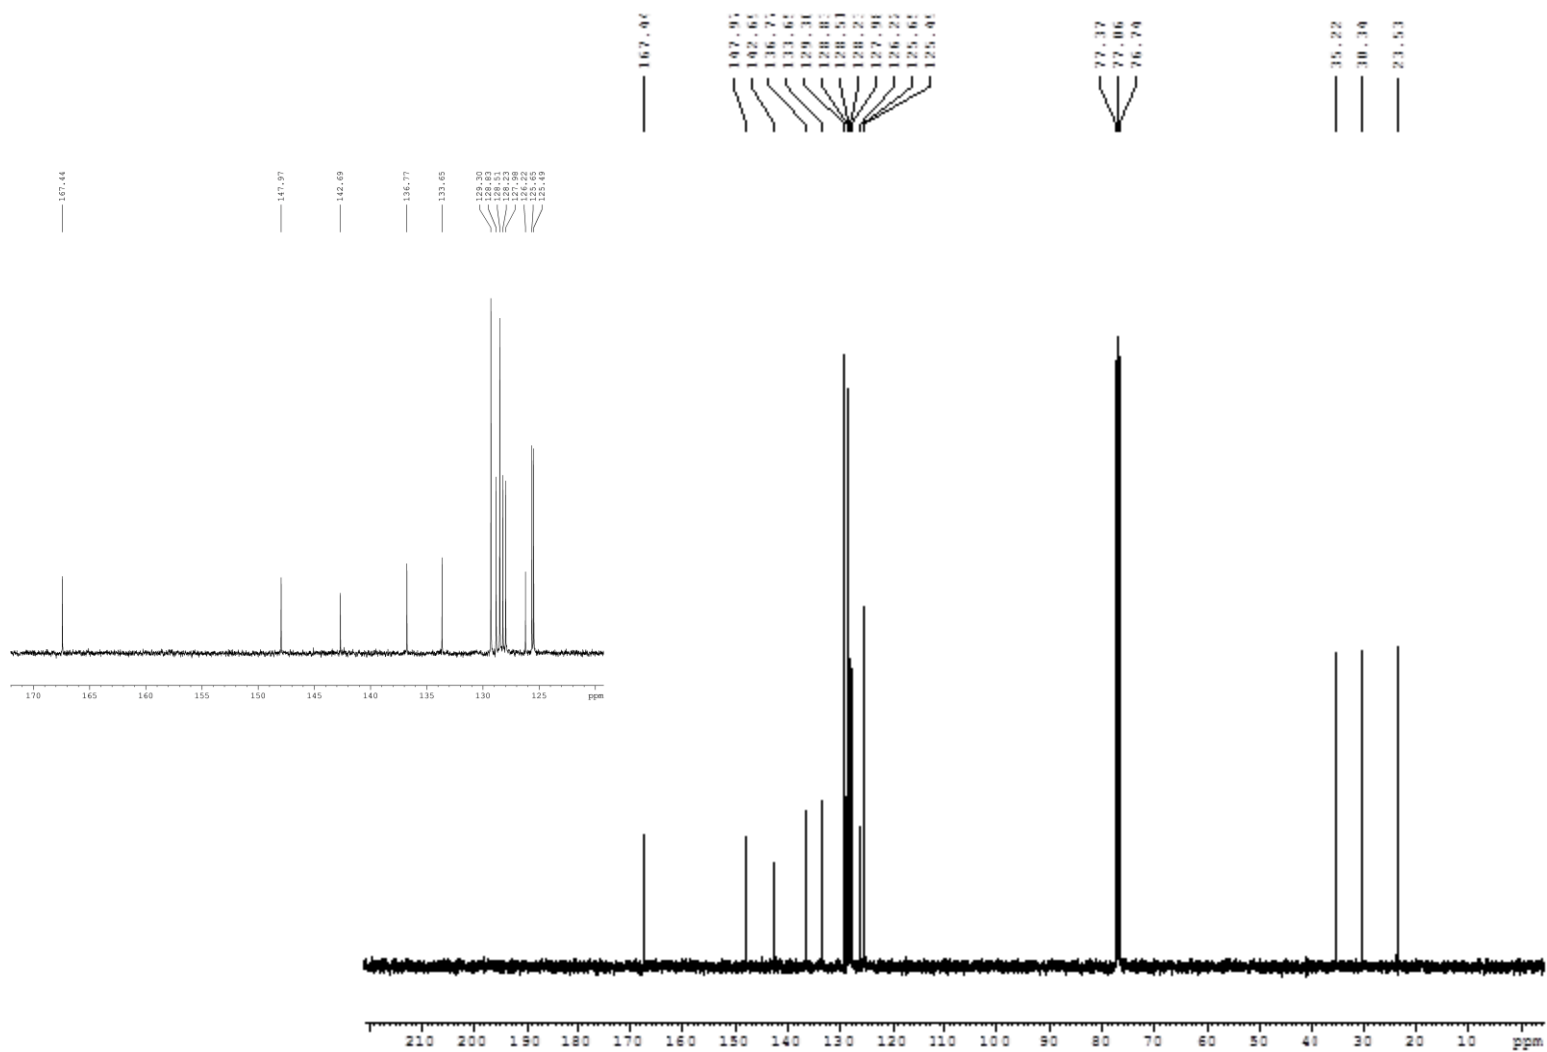

$^{13}\text{C}$  NMR spectrum of compound **8b** and its expansion

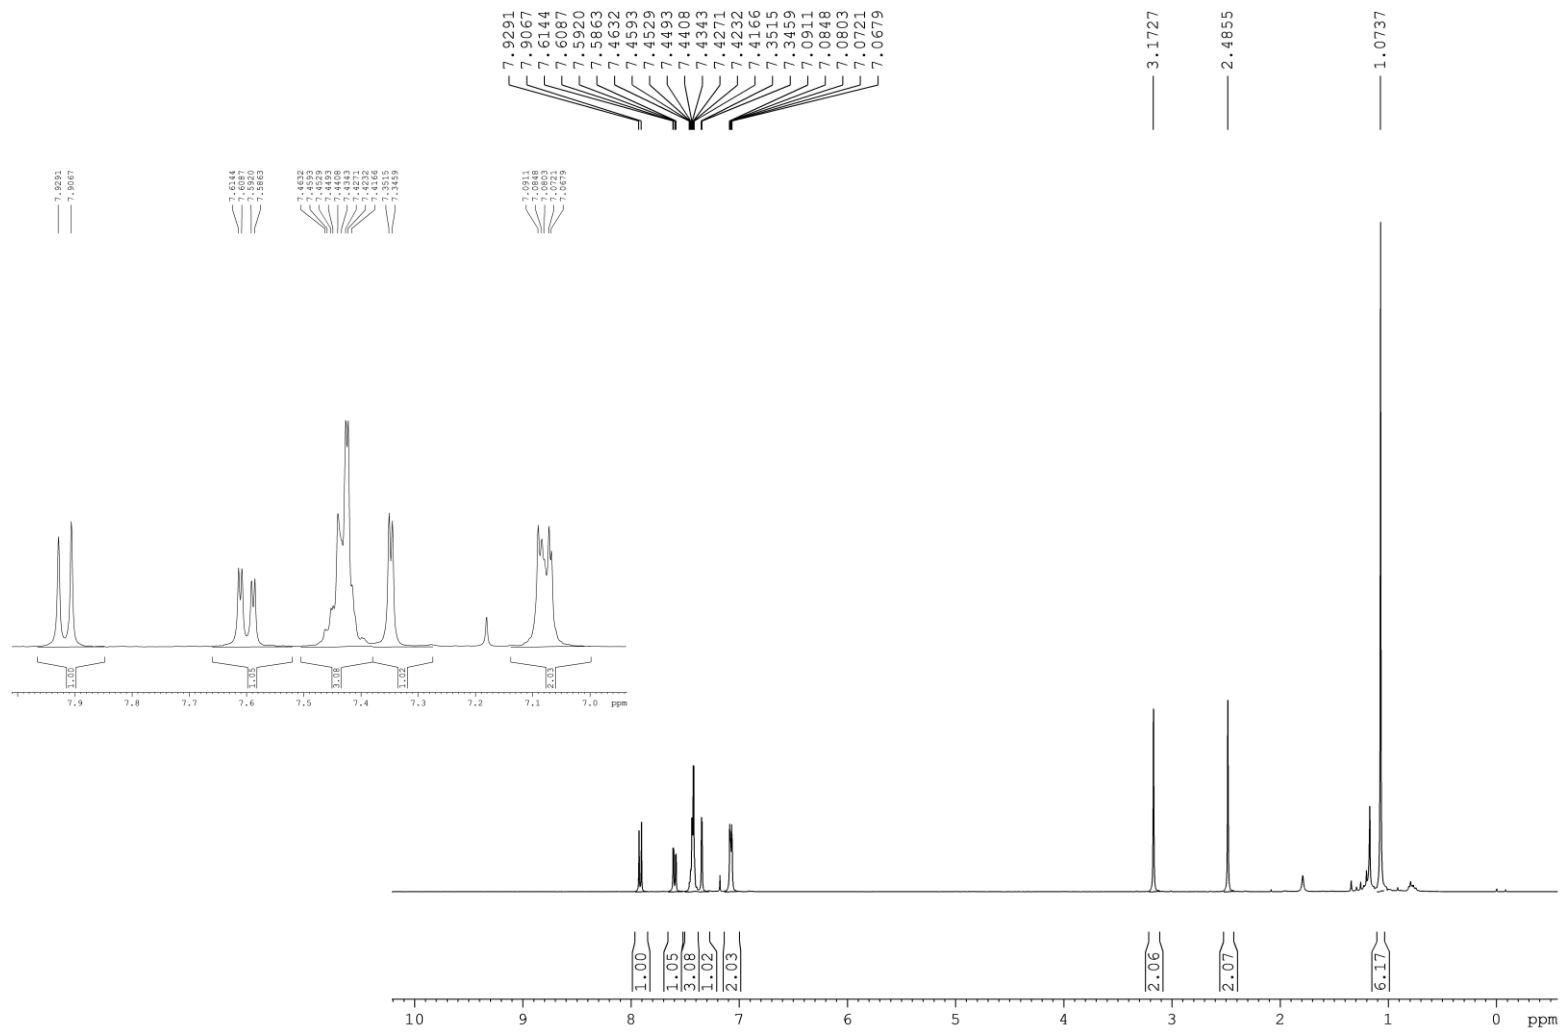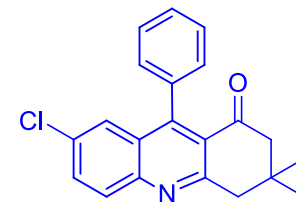

$^1\text{H}$  NMR spectrum of compound **8f** and its expansion



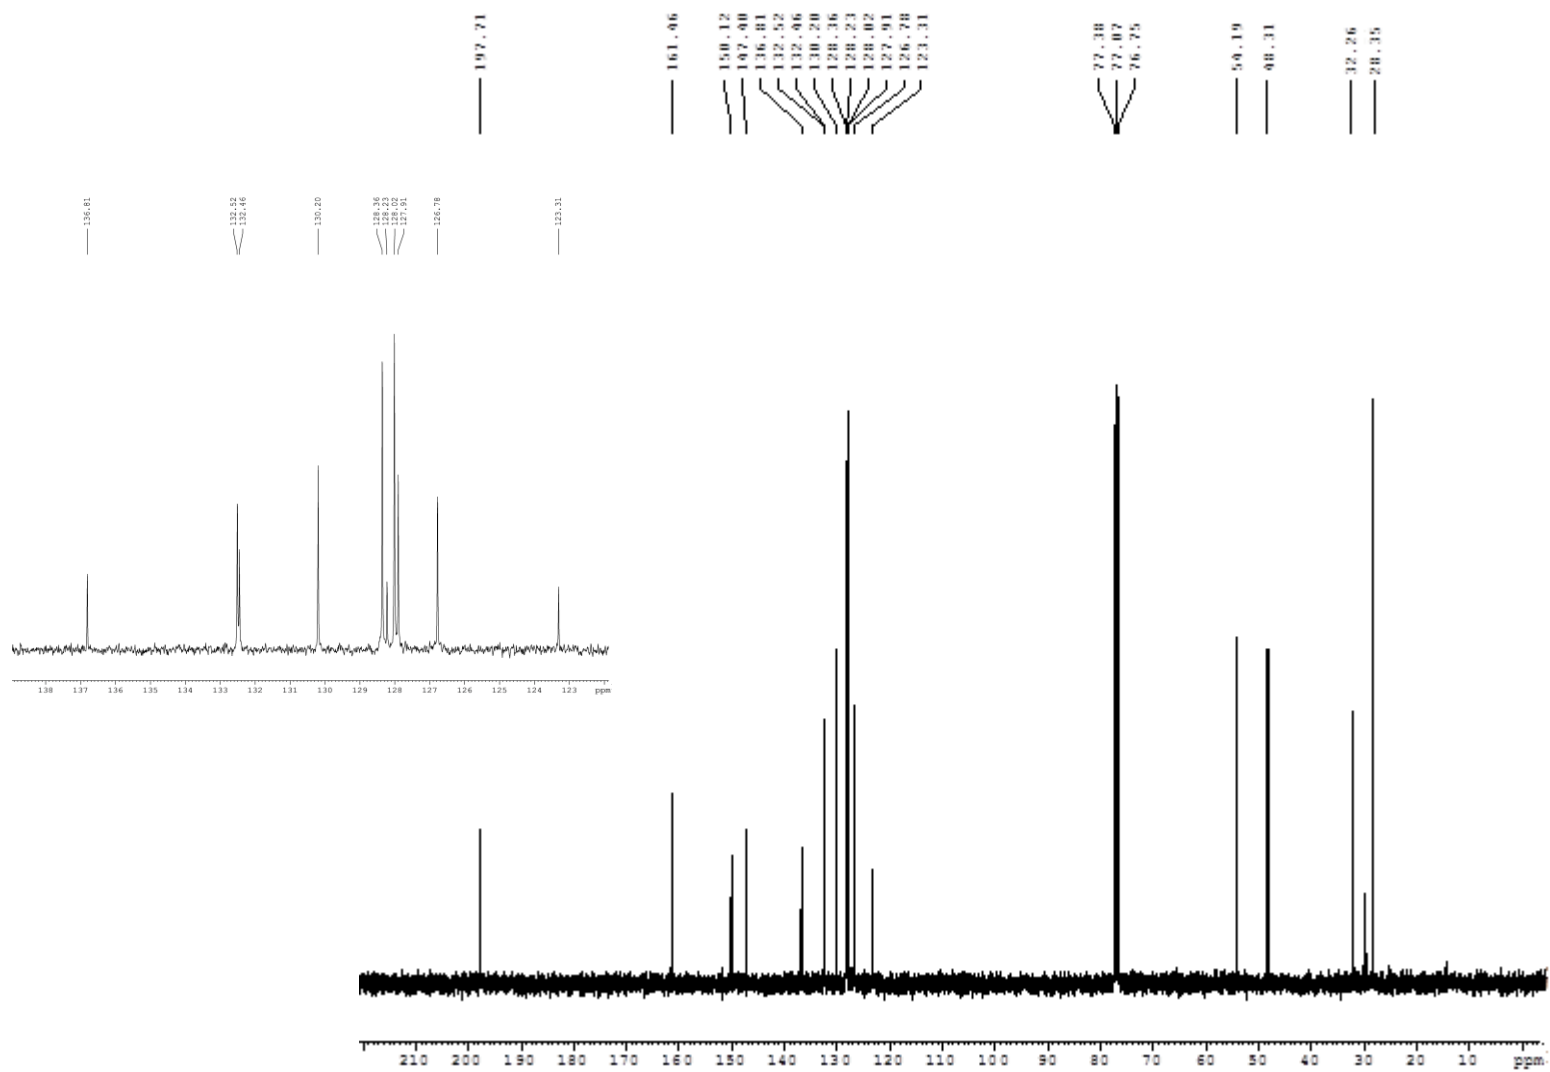

$^{13}\text{C}$  NMR spectrum of compound **8f** and its expansion

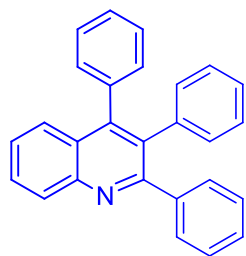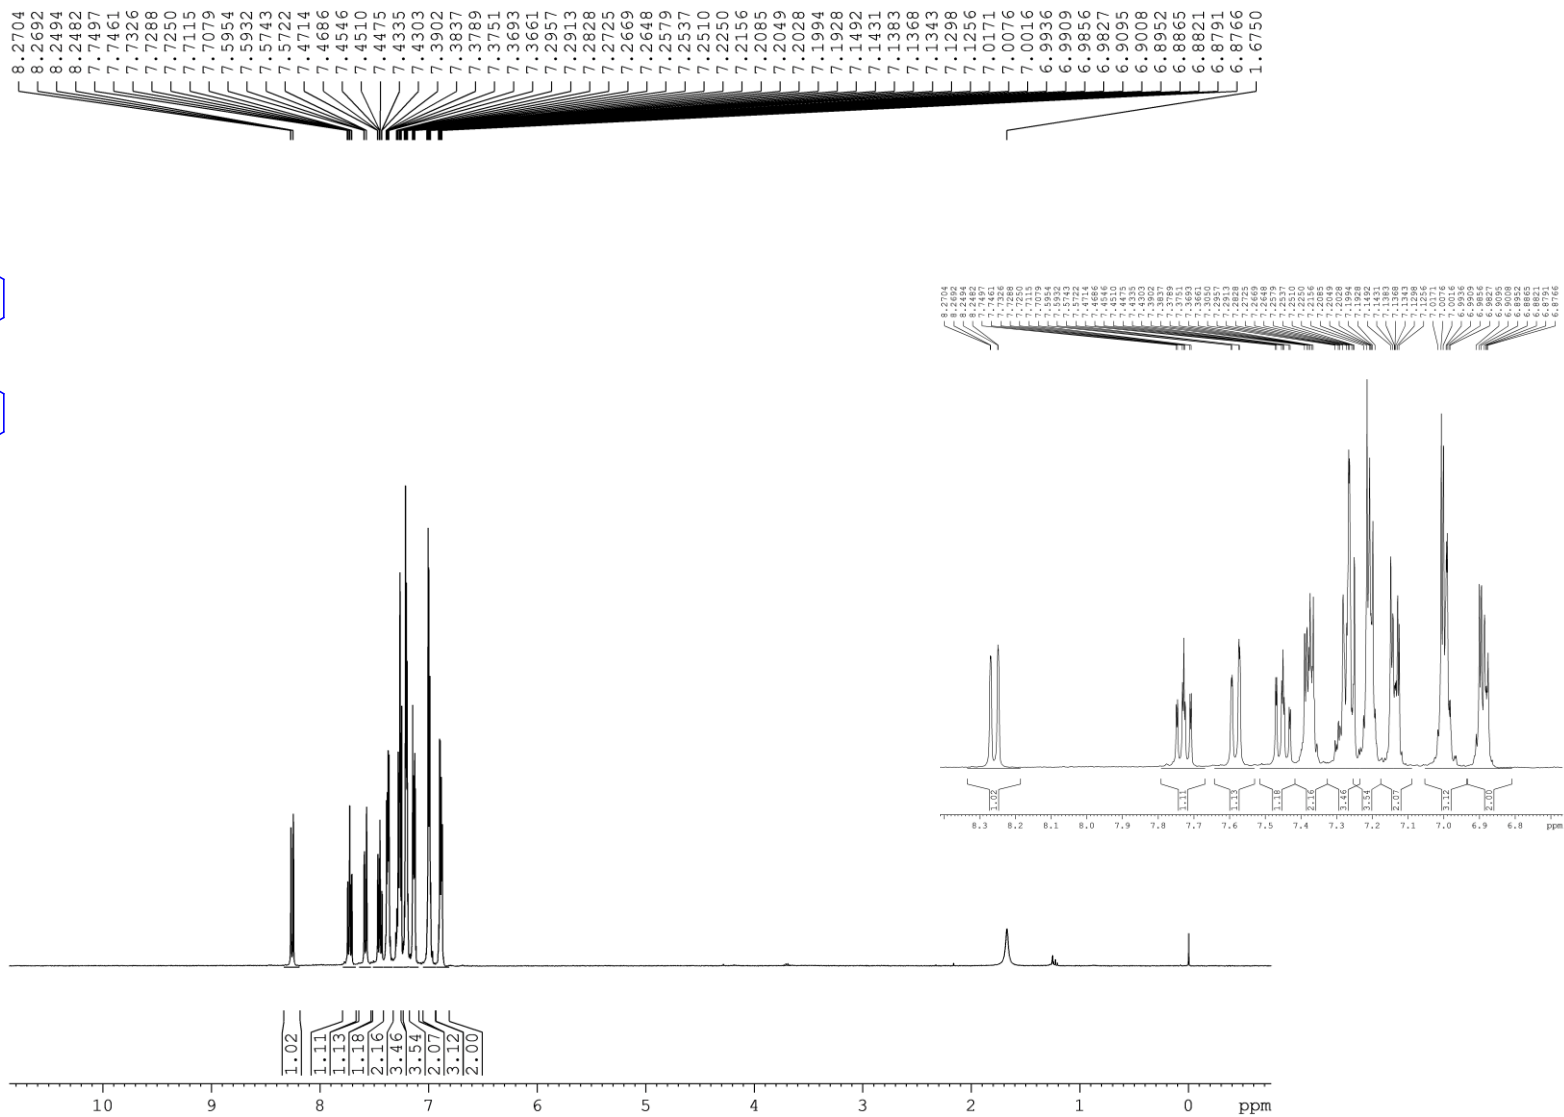

<sup>1</sup>H NMR spectrum of compound **10** and its expansion

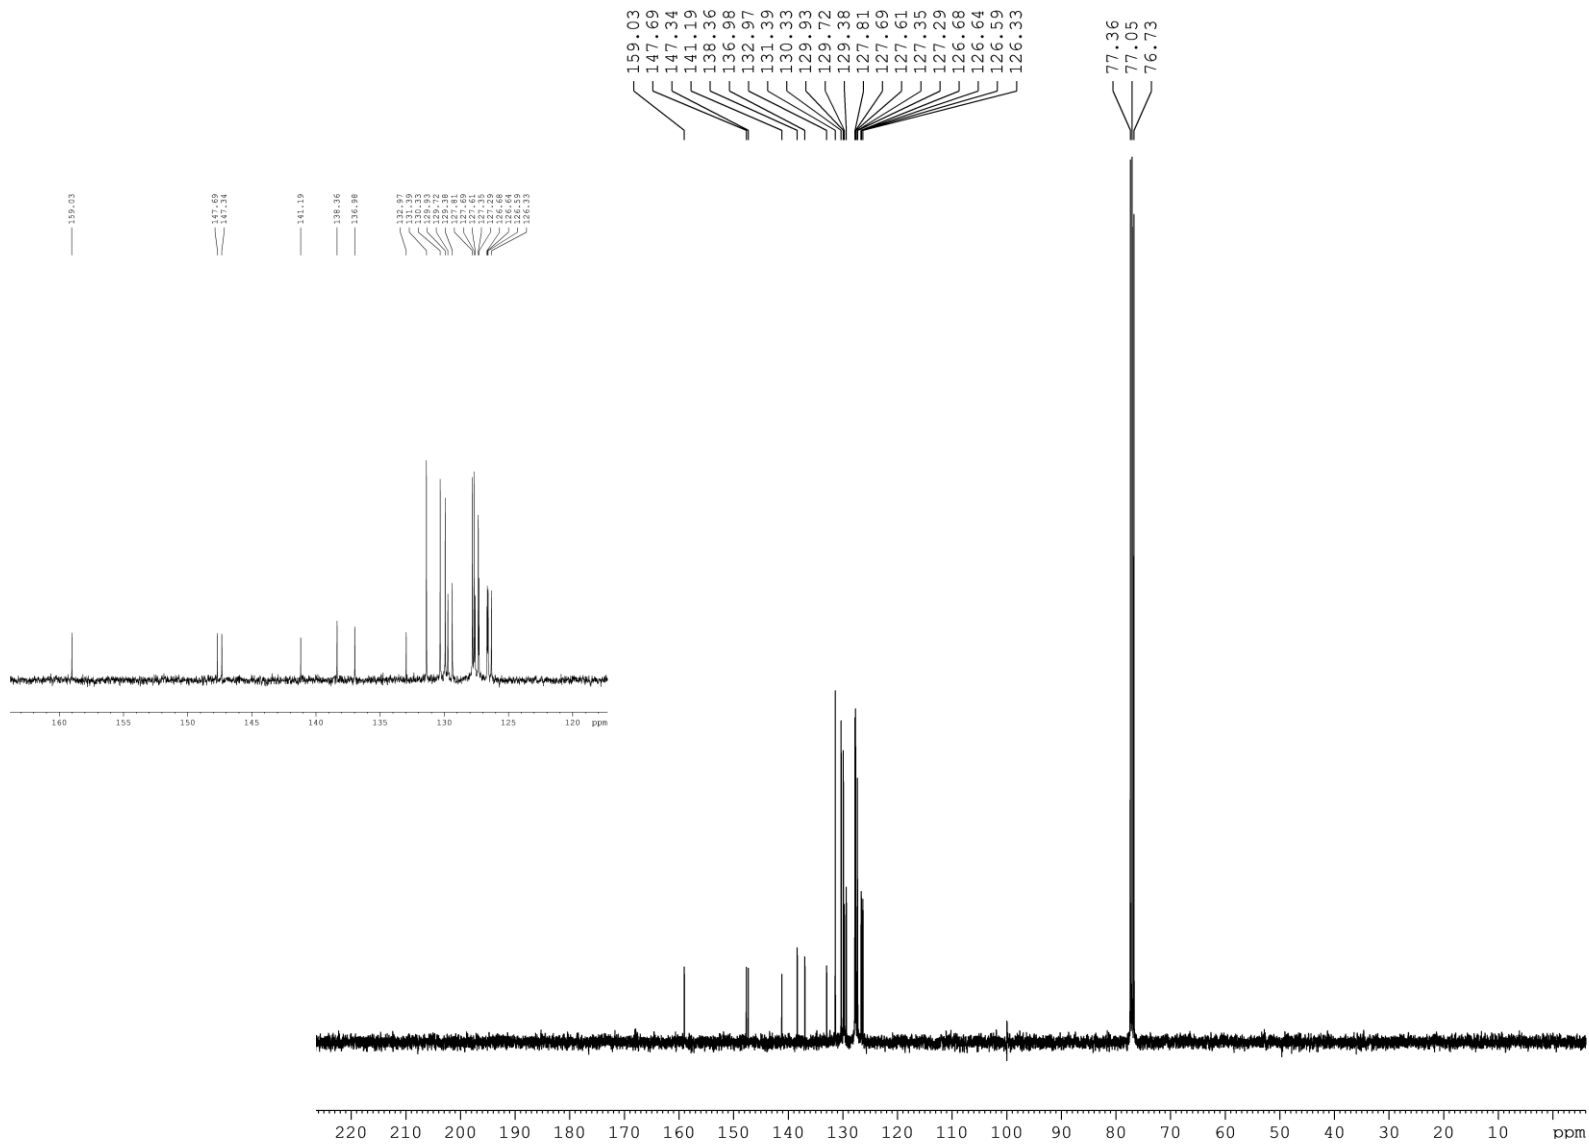

$^{13}\text{C}$  NMR spectrum of compound **10** and its expansion

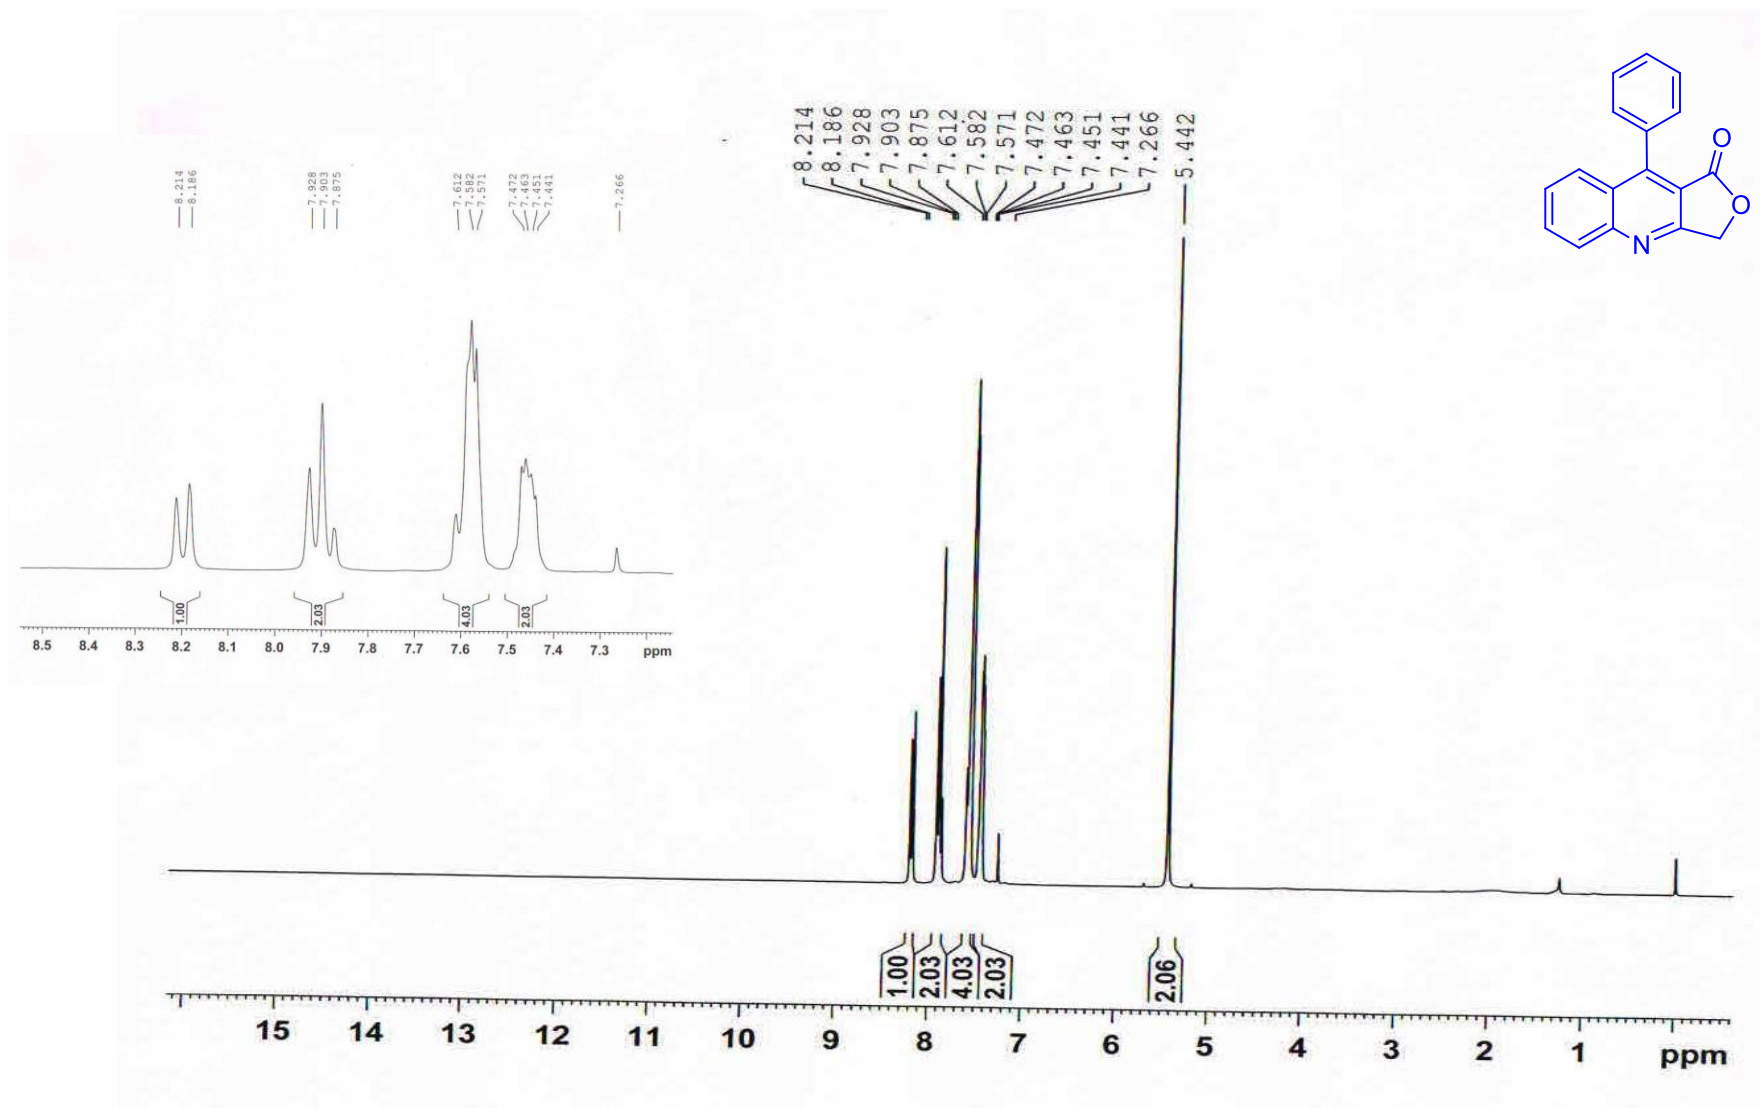

<sup>1</sup>H NMR spectrum of compound **12** and its expansion

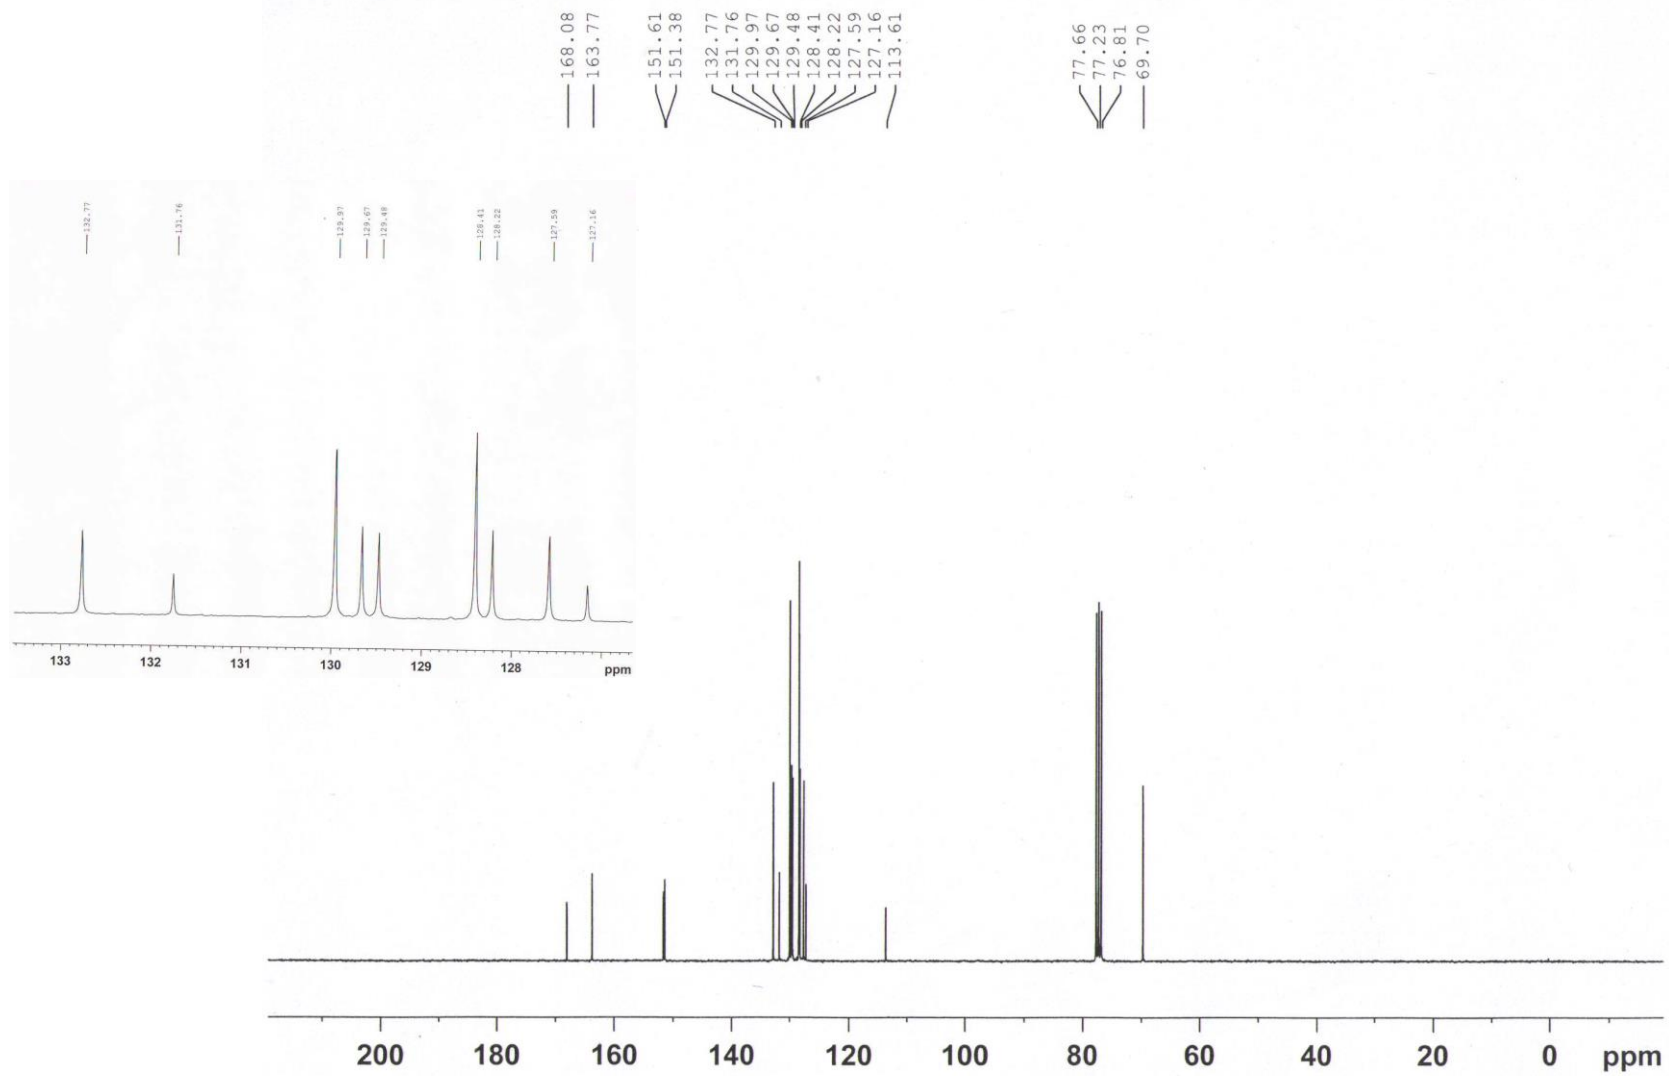

$^{13}\text{C}$  NMR spectrum of compound **12** and its expansion

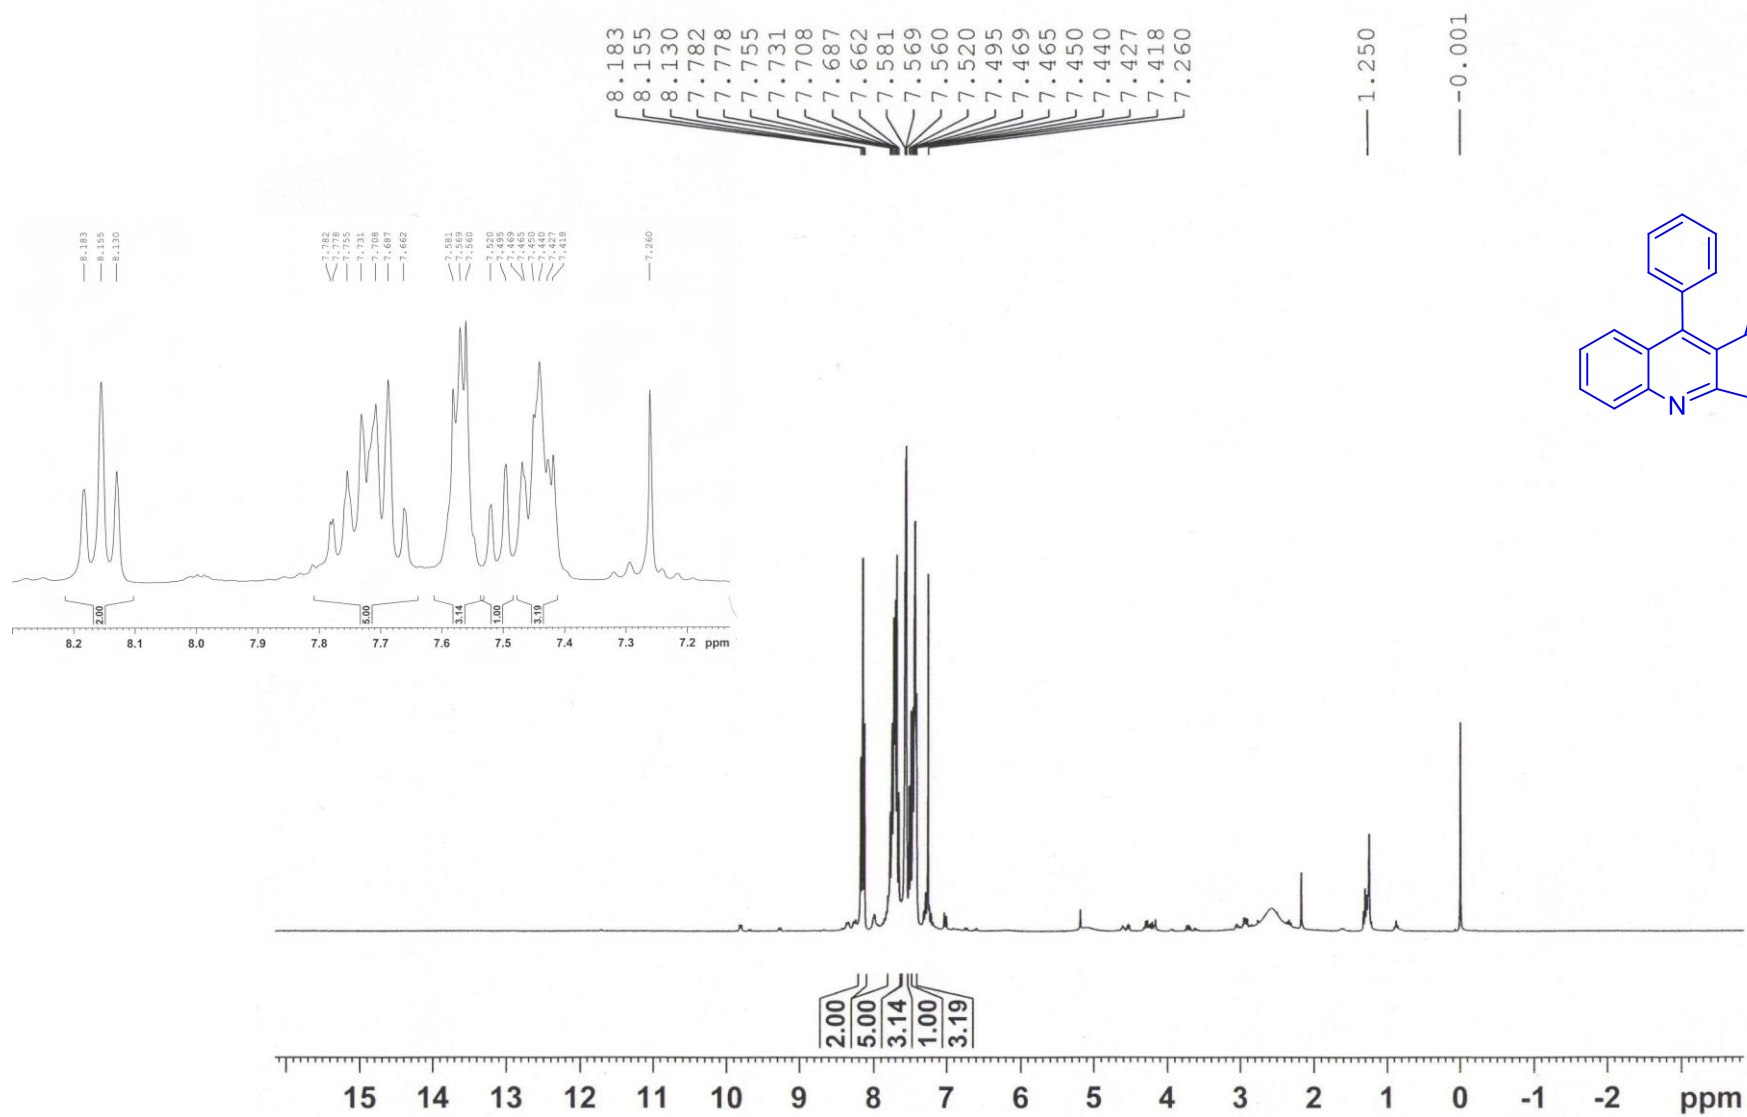

$^1\text{H}$  NMR spectrum of compound **14** and its expansion

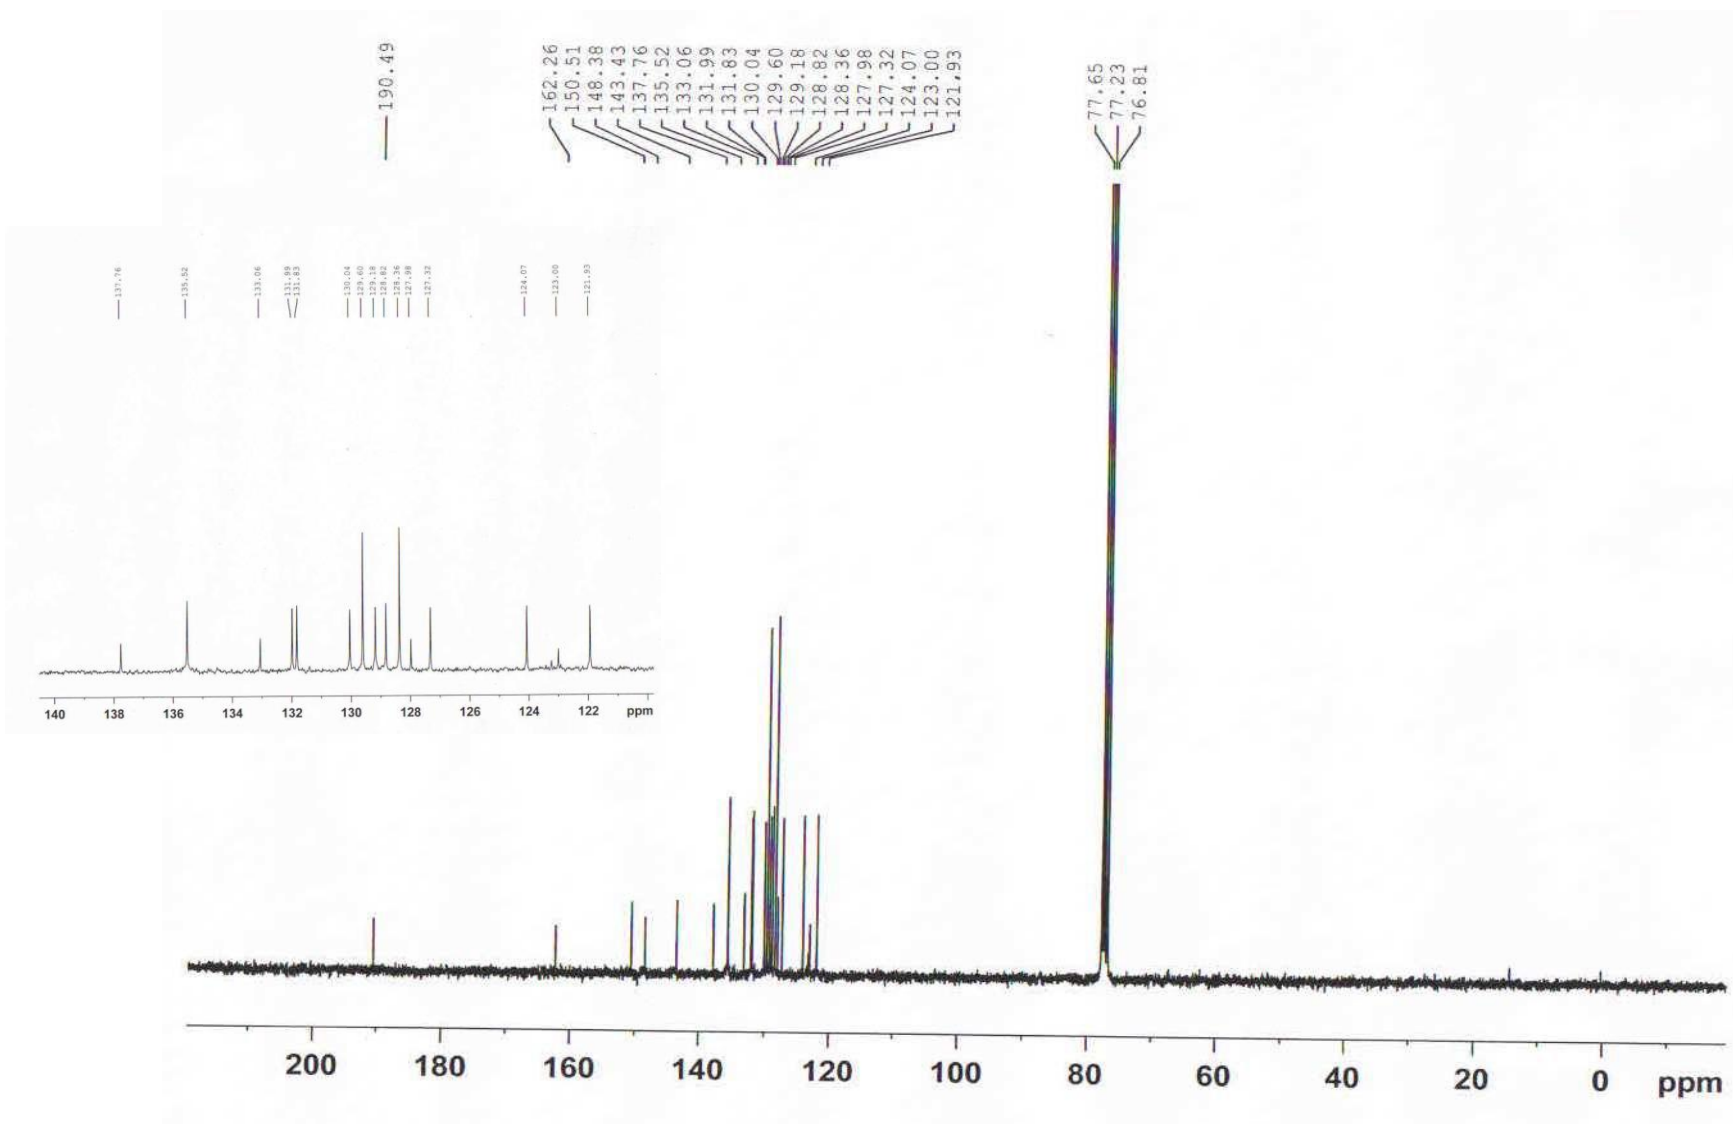

$^{13}\text{C}$  NMR spectrum of compound **14** and its expansion

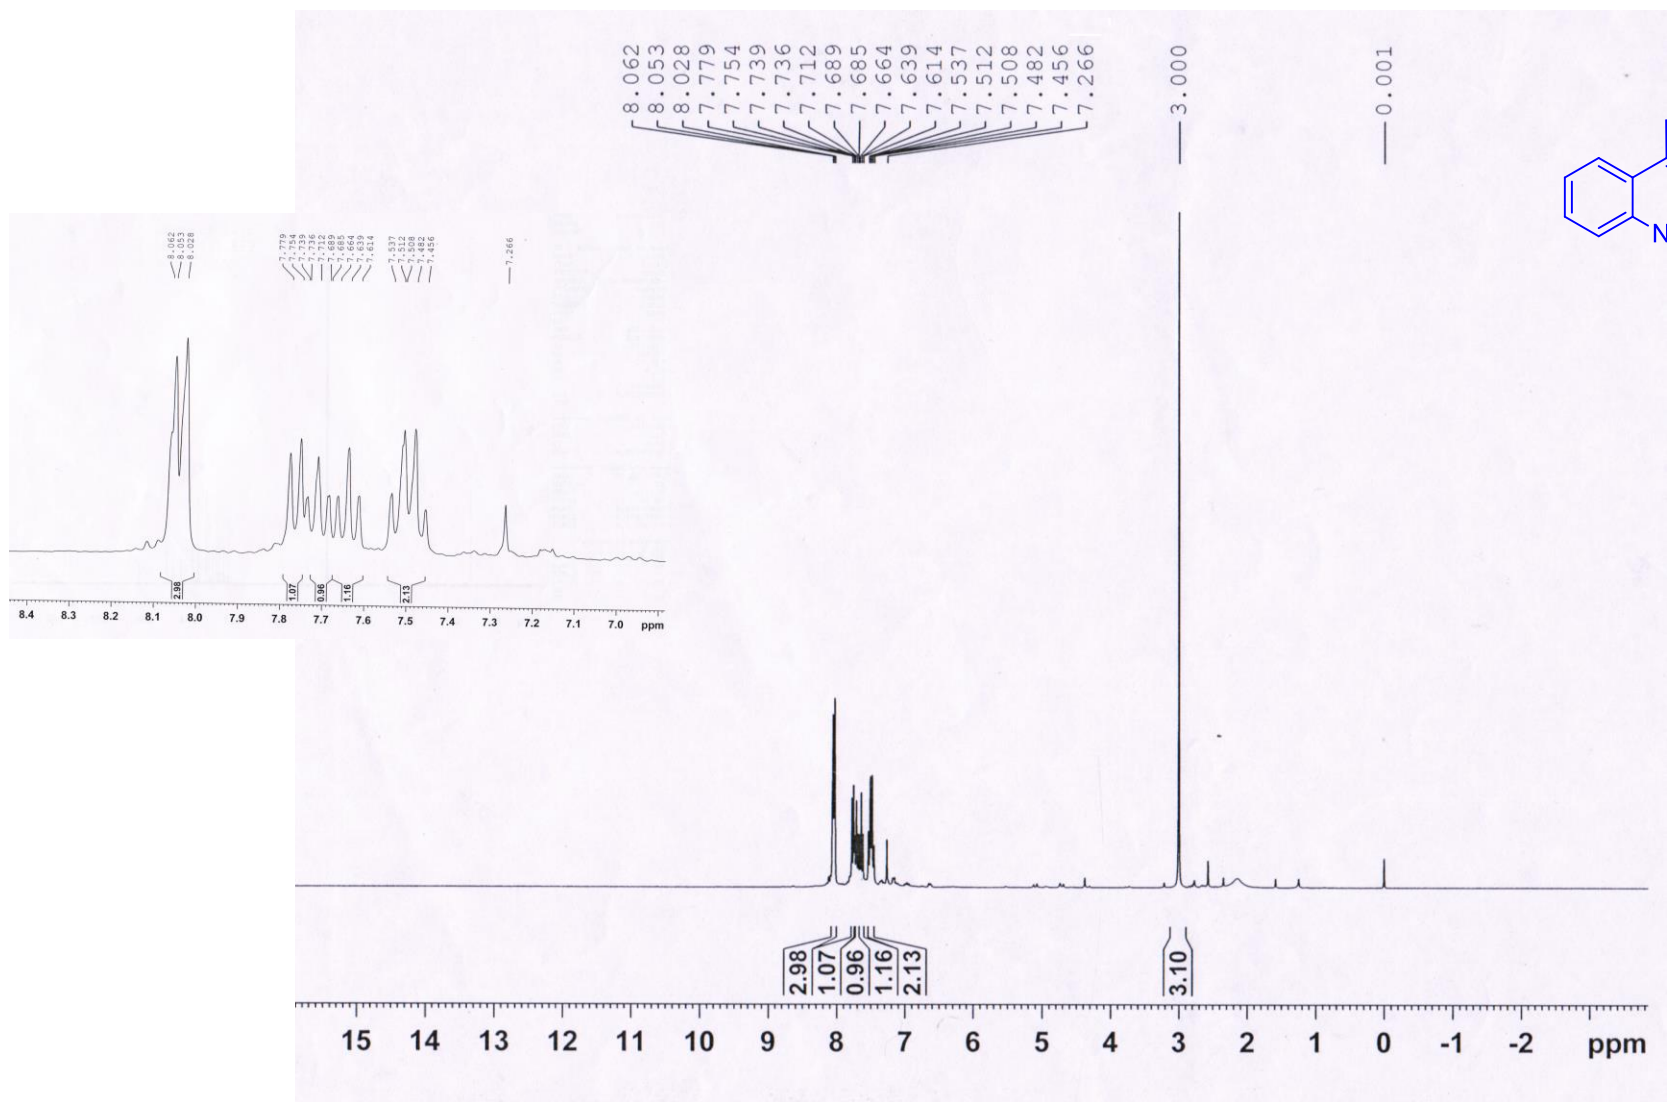

$^1\text{H}$  NMR spectrum of compound **15** and its expansion



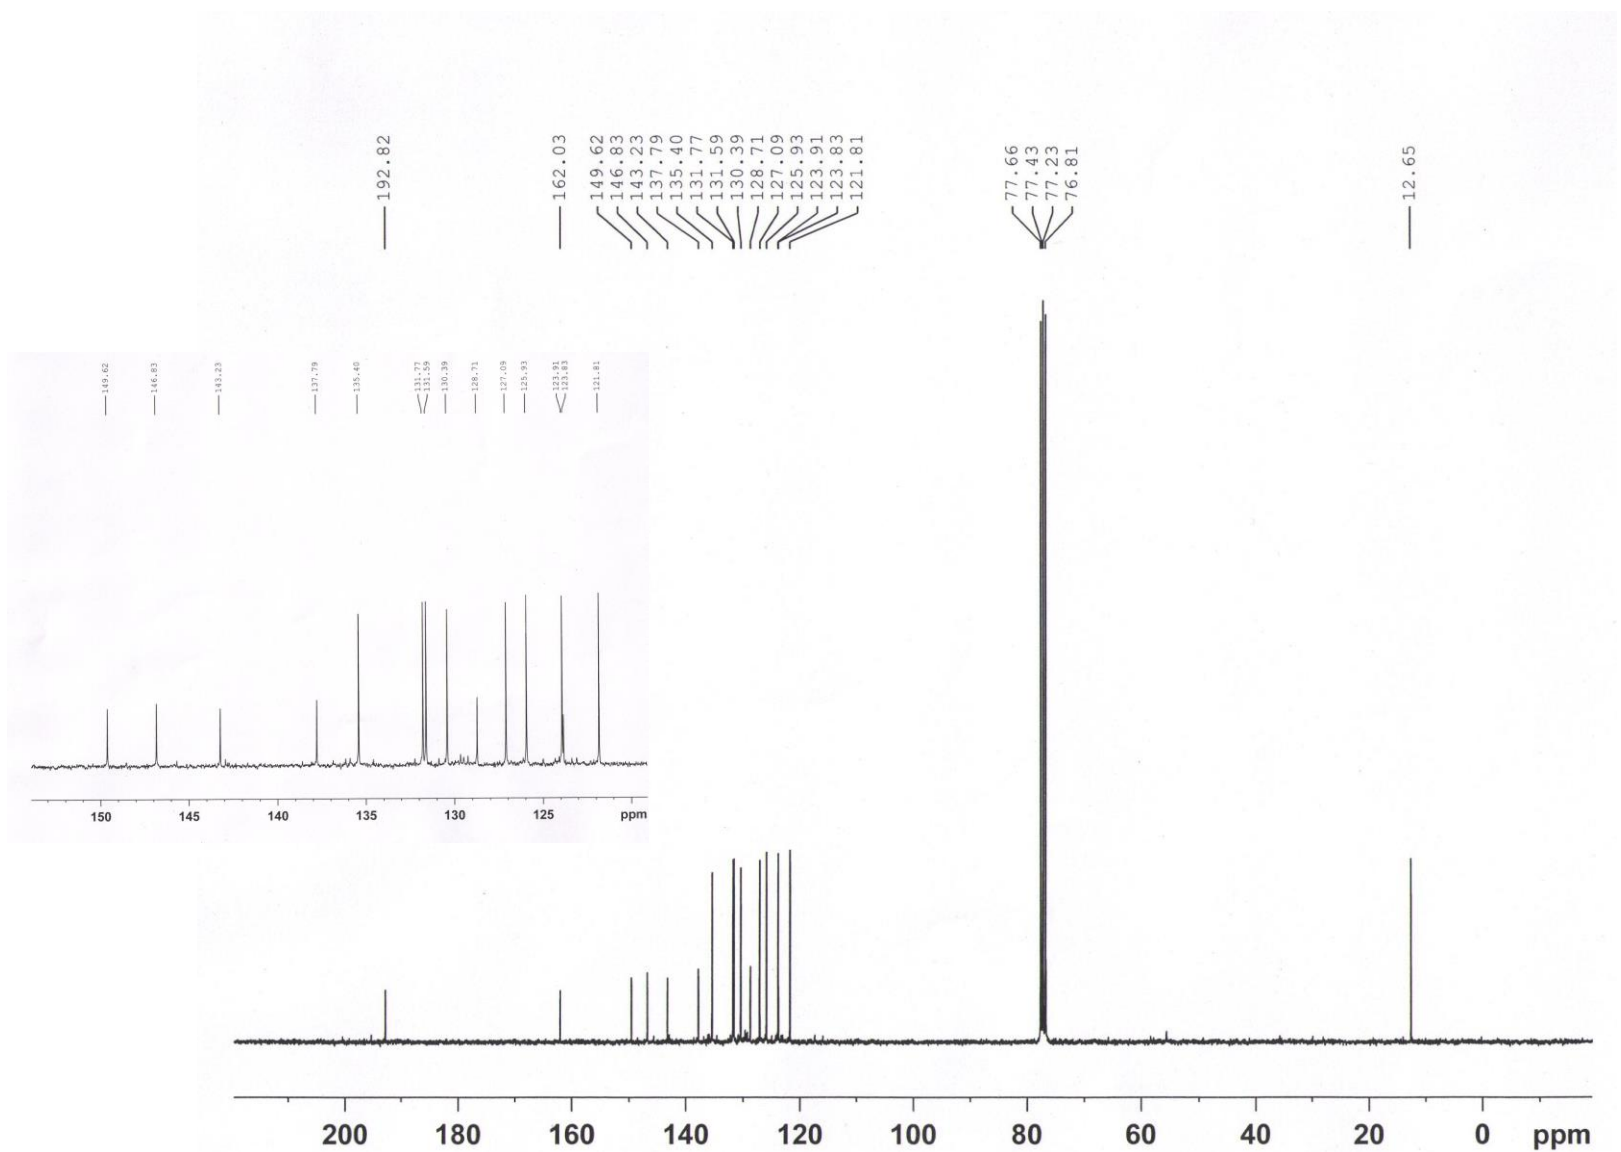

$^{13}\text{C}$  NMR spectrum of compound **15** and its expansion

**Table S1**

| Entry | Quinolines                                                                                      | M.P. (Observed) | M.P. (Reported) | Reference |
|-------|-------------------------------------------------------------------------------------------------|-----------------|-----------------|-----------|
| 1     | 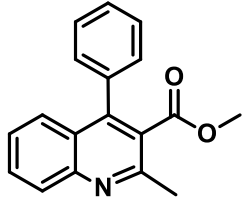<br><b>6a</b>  | 96-100 °C       | 99 °C           | 20b       |
| 2     | <br><b>6c</b>  | 104-106 °C      | 106 °C          | 20b       |
| 3     | <br><b>6e</b> | 133-136 °C      | 135 °C          | 20b       |

|   |                                                                                                      |            |            |     |
|---|------------------------------------------------------------------------------------------------------|------------|------------|-----|
| 4 | 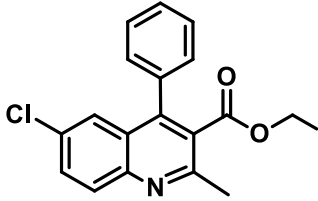 <p><b>6f</b></p>   | 104-108 °C | 104-105 °C | 17a |
| 5 |  <p><b>6g</b></p>   | 148-150 °C | 149-150 °C | 20b |
| 6 |  <p><b>6h</b></p>   | oil        | oil        | 20b |
| 7 |  <p><b>6i</b></p> | oil        | oil        | 20b |

|    |                                                                                                      |            |        |     |
|----|------------------------------------------------------------------------------------------------------|------------|--------|-----|
| 8  | 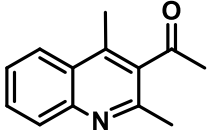 <p><b>6j</b></p>   | oil        | oil    | 17c |
| 9  |  <p><b>8c</b></p>   | 190-195 °C | 192 °C | 17a |
| 10 |  <p><b>8d</b></p>   | 157-160 °C | 159 °C | 17a |
| 11 |  <p><b>8e</b></p> | 152-157 °C | 159 °C | 17b |

|    |                                                                                                     |            |            |     |
|----|-----------------------------------------------------------------------------------------------------|------------|------------|-----|
| 12 | 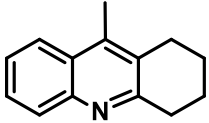 <p><b>8g</b></p>  | 76-80 °C   | 75-77 °C   | 17c |
| 13 |  <p><b>8h</b></p>  | 60-63 °C   | 58-60 °C   | 17c |
| 14 |  <p><b>8i</b></p>  | 105-108 °C | 104-106 °C | 20a |
| 15 |  <p><b>8j</b></p> | 67-70 °C   | 65-66 °C   | 17c |

## References

5. (c) M. J. Mphahlele, M. M. Mphahlele, *Molecules*, 2010, **15**, 7423-7437.
17. (a) J. Akbari, A. Heydari, H. R. Kalhor, S. A. Kohan, *J. Comb. Chem.* 2010, **12**, 137–140; (b) S. Ghassamipour, A. R. Sardarian *Tetrahedron Lett.*, 2009, **50**, 514–519; (c) G. Wang, C. Jia, Y. Dong, *Tetrahedron Lett.*, 2006, **47**, 1059-1063.
18. (b) F. Shirini, S. Akbari-Dadamahaleh, A. Mohammad-Khah, *Chinese J. Catal.*, 2013, **34**, 2200–2208
20. (a) D. S. Bose, M. Idrees, N. M. Jakka, and J. V. Rao, *J. Comb. Chem.*, 2010, **12**, 100–110; (b) R. Enugala, S. Nuvvula, V. Kotra, R. Varala, S.R. Adapa, *Heterocycles*, **75**, 2008, 2523 – 2533.
29. F. Shirini, S. Akbari-Dadamahaleh, A. Mohammad-Khah, *Chinese J. Catal.*, 2013, **34**, 2200–2208.
